# Supplementary material for: Innate Responses to the Former COVID-19 Vaccine Candidate CVnCoV and Their Relation to Reactogenicity and Adaptive Immunogenicity
Source: MDPI journal article supplement (doi:10.3390/vaccines12040388), 2024-04-06
Supplement: s1 [file s1]

## Supplementary Methods

### RNA-sequencing Analysis

**Sample and library preparation:** samples were divided into batches for RNA isolation and library preparation to avoid batch effects which could affect group comparisons. Whole blood was collected from study participants in PAXgene Blood RNA tubes (Qiagen, Hilden, Germany) and shipped to CeGaT for mRNA isolation, library preparation (KAPA RNA HyperPrep Kit with RiboErase y(HMR) Globin) and sequencing. Globin and rRNA were depleted in library construction. NGS library sequencing was on a NovaSeq 6000 (Illumina) with read length of 100 bp for read 1 and read 2 (in total 2x 100 bp). RNA sample quality was assessed by the RIN value and DV200 value using Qubit RNA (Thermo Fisher) and Fragment Analyzer (Agilent).

**Transcriptome sequencing data analysis:** demultiplexing of the sequencing reads was performed with Illumina bcl2fastq 2.20 and adapters were trimmed with Skewer 0.2.2. Reads with a Phred score of < 30 were removed using Trimmomatic 0.39. Trimmed raw reads were aligned to the human reference genome (hg19) with transcript annotation from Ensembl (GRCh37, v75) using STAR 2.5.2b and multimappers removed. The quality of the FASTQ files were analyzed with FastQC. The read length after adapter trimming, the average base quality per read (as Phred score) and average GC content of the reads were examined via histograms.

**Differential expression analysis:** group comparisons for testing significant differentially expressed genes (DEGs) performed by CeGaT with DESeq2 [1] in R (version 3.6.1) [2]. DESeq2 uses a negative binomial generalized linear model to test for differential expression based on gene counts. As recommended by DESeq2, genes with less than two reads over all samples were removed and finally normalized. Sample RNA quality including possible sample outlier and sample characteristics were investigated by a PCA and dendrogram on rlog-transformed read counts. For each type of group comparison counts were modeled by the design formulas:

- A2, A3, A4: subject\_ID + Day
- A5, A6, A7: Dose\_group

Log2 fold changes were calculated, and the Wald test was applied for statistical testing with a significance level of 0.05 including a multiple testing correction by Benjamini-Hochberg [3] for adjusting the p-values. For each comparison, genes with a read count of zero in all compared samples or a read count of 1 in only one sample were excluded.

DEGs from group comparisons were further applied to gene set enrichment analysis (GSEA, Linux Version 4.1.0) [4,5] by CureVac Bioinformatics to the Blood Transcription Modules (BTM version 8 from October 2013 [6]) and HALLMARK molecular Signatures Database (MSigDB, version 7.4 [7]) gene set databases. The 50 HALLMARKs show a wide range of biological processes and were summarized from multiple founder gene sets to reduce variation and redundancy. The BTMs were identified from systems signatures from five human vaccines from a large-scale network integration of public human blood transcriptomes, and systems-scale databases in specific biological contexts. The 382 BTM sets (modules) are annotated by their function and focus more on processes related to immunity.

**GSEA parameter:** genes for GSEA were pre-ranked (according to metric described in Reimand et al. [8]). Firstly, all significant (cut-off adjusted P value < 0.05) differentially expressed genes for each group comparison were extracted. A score per gene  $S_{gene\ i}$  was calculated and finally all genes per group comparison were sorted in a decreasing order. The scoring metric uses the sign (*sign*) of the log2 fold change of each gene ( $\log_2FC_{gene\ i}$ ) with negative logarithm ( $\log_{10}$ ) of adjusted P value ( $padj_{gene\ i}$ ) based on multiple testing using the Benjamini-Hochberg method:

$$S_{gene\ i} = sign(\log_2FC_{gene\ i}) * (-\log_{10}(padj_{gene\ i}))$$

The ranked gene list per group comparison is received where top genes on the list represent up-regulation and genes at the bottom of the list down-regulation.

GSEA default settings were used, number of permutations was set to 10,000 and type of permutation was “genotype” because of pre-ranked gene list. To include HGNC (HUGO Gene Nomenclature Committee) gene annotations in the analysis report the command “collapse” was used and the chip annotation file Human\_Gene\_Symbol\_with\_Remapping\_MSigDB.v7.4.chip.

Results from GSEA were visualized in R (4.0.4) as heatmaps using the ComplexHeatmap (2.6.2) package [9] and significant DEGs as bar plots with ggplot2 in R (4.0.4) [10].

## Supplementary Tables

Table S1. Cytokines and Chemokines Included in Serum Cytokine Analysis

| Cytokine Abbreviation | Abbreviation Meaning                       |
|-----------------------|--------------------------------------------|
| APRIL                 | A-proliferation-inducing ligand            |
| BAFF                  | B-cell activating factor                   |
| CCL4                  | C-C chemokine ligand 4                     |
| CXCL9                 | C-X-C chemokine ligand 9                   |
| CXCL11                | C-X-C chemokine ligand 11                  |
| CXCL13                | C-X-C chemokine ligand 13                  |
| CD40L                 | CD40 Ligand                                |
| CD62L                 | CD62 Ligand                                |
| FasL                  | Fas Ligand                                 |
| ICAM-1                | Intercellular adhesion molecule 1          |
| IFN $\alpha$          | Interferon $\alpha$                        |
| IFN $\beta$           | Interferon $\beta$                         |
| IFN $\gamma$          | Interferon $\gamma$                        |
| IL-1 $\alpha$         | Interleukin 1a                             |
| IL-2                  | Interleukin 2                              |
| IL-4                  | Interleukin 4                              |
| IL-5                  | Interleukin 5                              |
| IL-6                  | Interleukin 6                              |
| IL-10                 | Interleukin 10                             |
| IL-12(p70)            | Interleukin 12(p70)                        |
| IL-13                 | Interleukin 13                             |
| IL-17A                | Interleukin 17A                            |
| IP-10                 | Interferon gamma-induced protein 10        |
| MCP-1                 | Monocyte chemotactic protein 1             |
| MCP-4                 | Monocyte chemotactic protein 4             |
| MDC                   | Macrophage-derived chemokine               |
| MICA                  | MHC class I polypeptide-related sequence A |
| MIP-1 $\alpha$        | Macrophage inflammatory protein 1 $\alpha$ |
| SCF                   | Stem cell factor                           |
| TNF $\alpha$          | Tumour necrosis factor $\alpha$            |

**Table S2.** Antibodies Used for ICS

| Marker       | Clone     | Supplier       | Catalogue Number |
|--------------|-----------|----------------|------------------|
| Live/dead    | -         | Invitrogen     | L34966           |
| CD8          | SK1       | BD Biosciences | 641400           |
| CD4          | SK3       | BD Biosciences | 345770           |
| CD3          | UCHT1     | BD Biosciences | 557943           |
| CD40L        | TRAP1     | BD Biosciences | 555700           |
| IL-2         | MQ1-17H12 | BD Biosciences | 554567           |
| TNF $\alpha$ | MAb11     | BD Biosciences | 557647           |
| IFN $\gamma$ | 4S.B3     | BD Biosciences | 554551           |

**Table S3.** Peptides Used for Mass Cytometry Analysis

| No. | Peptide name | Peptide sequence | Antigen      | HLA     |
|-----|--------------|------------------|--------------|---------|
| 1   | A*02:01_1    | KLPDDFTGCV       | S            | A*02:01 |
| 2   | A*02:01_2    | LITGRLQSL        | S            |         |
| 3   | A*02:01_3    | RLNEVAKNL        | S            |         |
| 4   | A*02:01_4    | YLQPRTFLL        | S            |         |
| 5   | A*02:01_5    | RLQSLQTYV        | S            |         |
| 6   | A*02:01_6    | VLNDILSRL        | S            |         |
| 7   | A*02:01_7    | KIADYNYKL        | S            |         |
| 8   | A*02:01_8    | SIHAYTMSL        | S            |         |
| 9   | A*02:01_9    | LLFNKVTLA        | S            |         |
| 10  | A*02:01_10   | RLDKVEAEV        | S            |         |
| 11  | A*02:01_11   | HLMSFPQSA        | S            |         |
| 12  | A*02:01_12   | FIAGLIAIV        | S            |         |
| 13  | A*02:01_13   | ALNTLVKQL        | S            |         |
| 14  | A*02:01_14   | NLNESLIDL        | S            |         |
| 15  | A*02:01_15   | VVFLHVTYV        | S            |         |
| 16  | A*02:01_C1   | VLEETSVML        | CMV-IE1      |         |
| 17  | A*02:01_C2   | NLVPMVATV        | CMV-pp65     |         |
| 18  | A*02:01_C3   | CLGGLTMV         | EBV-LMP2A    |         |
| 19  | A*02:01_C4   | FLYALALLL        | EBV-LMP2A    |         |
| 20  | A*02:01_C5   | GILGFVFTL        | Flu-M1       |         |
| 21  | A*11:01_1    | GVYFASTEK        | S            | A*11:01 |
| 22  | A*11:01_2    | TLKSFTVEK        | S            |         |
| 23  | A*11:01_3    | RLFRKSNLK        | S            |         |
| 24  | A*11:01_4    | NSASFSTFK        | S            |         |
| 25  | A*11:01_5    | VTYVPAQEK        | S            |         |
| 26  | A*11:01_6    | SSTASALGK        | S            |         |
| 27  | A*11:01_7    | ASANLAATK        | S            |         |
| 28  | A*11:01_8    | GTHWFVTQR        | S            |         |
| 29  | A*11:01_9    | MTSCCCLK         | S            |         |
| 30  | A*11:01_C1   | ATVQGQNLK        | CMV-pp65     |         |
| 31  | A*11:01_C2   | AVFDRKSDAK       | EBV(EBNA 3B) |         |
| 32  | A*11:01_C3   | SSCSSCPLSK       | EBV(LMP2)    |         |
| 33  | A*11:01_C4   | SIIPSGPLK        | Flu-MP1      |         |
| 34  | A*24:02_1    | NYNYLYRLF        | S            | A*24:02 |
| 35  | A*24:02_2    | VYSTGSNVF        | S            |         |
| 36  | A*24:02_3    | EYVSQPFLM        | S            |         |
| 37  | A*24:02_4    | QYIKWPWYI        | S            |         |
| 38  | A*24:02_5    | LYNSASFSTF       | S            |         |
| 39  | A*24:02_6    | PYRVVLSF         | S            |         |
| 40  | A*24:02_7    | YYVGYLQPRTF      | S            |         |
| 41  | A*24:02_8    | VYSSANNCTF       | S            |         |
| 42  | A*24:02_9    | IYKTPPIKDF       | S            |         |
| 43  | A*24:02_10   | RFDNPVLPF        | S            |         |

| No. | Peptide name | Peptide sequence | Antigen             | HLA     |
|-----|--------------|------------------|---------------------|---------|
| 44  | A*24:02_11   | PFFSNVTWF        | S                   | A*03:01 |
| 45  | A*24:02_12   | RFPNITNLCPF      | S                   |         |
| 46  | A*24:02_13   | TYVPAQEKNF       | S                   |         |
| 47  | A*24:02_C1   | QYDPVAALF        | CMV-2 pp65 341-349  |         |
| 48  | A*24:02_C2   | AYAQKIFKIL       | CMV-5-IE1           |         |
| 49  | A*24:02_C3   | RYSIFFDYM        | EBV-10-EBNA3A NP    |         |
| 50  | A*24:02_C4   | RYGFVANF         | Flu-8-Pol           |         |
| 51  | A*24:02_C5   | TYQWIIRNW        | Flu-PB2             |         |
| 52  | A*03:01_1    | GVYFASTEK        | S                   |         |
| 53  | A*03:01_2    | TLKSFTVEK        | S                   |         |
| 54  | A*03:01_3    | RLFRKSNLK        | S                   | A*01:01 |
| 55  | A*03:01_4    | VTYVPAQEK        | S                   |         |
| 56  | A*03:01_5    | QIYKTPPIK        | S                   |         |
| 57  | A*03:01_6    | ASANLAATK        | S                   |         |
| 58  | A*03:01_7    | MTSCCCLK         | S                   |         |
| 59  | A*03:01_8    | KVFRSSVLH        | S                   |         |
| 60  | A*03:01_9    | RQIAPGQTGK       | S                   |         |
| 61  | A*03:01_10   | KCYGVSPTK        | S                   |         |
| 62  | A*03:01_C1   | KLGGALQAK        | CMV (IE-1)          |         |
| 63  | A*03:01_C2   | RLRAEAQVK        | EBV (EMNA 3A)       |         |
| 64  | A*03:01_C3   | ILRGSVAHK        | Influenza (PR8)     |         |
| 65  | A*01:01_1    | WTAGAAAYY        | S                   | B*07:02 |
| 66  | A*01:01_2    | LADAGFIQY        | S                   |         |
| 67  | A*01:01_3    | LTDEMIAQY        | S                   |         |
| 68  | A*01:01_4    | TSNQVAVLY        | S                   |         |
| 69  | A*01:01_C1   | VTEHDTLLY        | CMV (UL44)          |         |
| 70  | A*01:01_C2   | YSEHPTFTSQY      | CMV (pp65)          |         |
| 71  | A*01:01_C3   | CTELKLSDY        | Influenza (NP)-A01  |         |
| 72  | A*01:01_C4   | VSDGGPNLY        | Influenza (PB1)-A01 |         |
| 73  | B*07:02_1    | SEPVLKGVKL       | S                   |         |
| 74  | B*07:02_2    | LPQGFSAL         | S                   |         |
| 75  | B*07:02_3    | KPFERDISTEI      | S                   | B*07:02 |
| 76  | B*07:02_4    | QPYRVVVL         | S                   |         |
| 77  | B*07:02_5    | LPFNDGVYF        | S                   |         |
| 78  | B*07:02_6    | SPRRARSA         | S                   |         |
| 79  | B*07:02_7    | IPTNFTISV        | S                   |         |
| 80  | B*07:02_8    | APHGVVFL         | S                   |         |
| 81  | B*07:02_C1   | RIPHERNGFTVL     | CMV (pp65 #1)       |         |
| 82  | B*07:02_C2   | RPPIFIRRL        | EBV (EBNA 3A)       |         |
| 83  | B*07:02_C3   | SPIVPSFDM        | Influenza (NP)      |         |
| 84  | B*07:02_C4   | QPEWFRNVL        | Influenza (PB1)     |         |

**Table S4.** Antibodies Used for Mass Cytometry

| Marker                    | Clone      | Catalogue number    | Company               |
|---------------------------|------------|---------------------|-----------------------|
| CD45                      | Y-89       | HI30 3089003B       | Standard BioTools Inc |
| CD19                      | HIB19      | bl302202            | BioLegend             |
| CD8                       | SK1        | bl344727            | BioLegend             |
| CD14                      | TUK4       | MCA1568GA           | BioRAD                |
| CD4                       | SK3        | bl344602            | BioLegend             |
| CD57                      | HNK-1      | bl359602            | BioLegend             |
| CD3                       | UCHT1      | bl300414            | BioLegend             |
| TCR $\gamma$ / $\delta$ 1 | B1         | 331210              | BioLegend             |
| PE2                       | PE001      | bl408102            | BioLegend             |
| CD56                      | NCAM16.2   | bd559043            | BD                    |
| HLA-DR                    | L243       | bl307602            | BioLegend             |
| CD27                      | LG.7F9     | 14-0271-85          | Invitrogen            |
| CD24                      | ML5        | 311127              | Biolegend             |
| CXCR5                     | RF8B2      | bd552032            | BD                    |
| CRTH2                     | BM16       | 13294982            | eBioscience           |
| CD95                      | DX2        | 305602              | BioLegend             |
| CD45RO                    | UCHL1      | 304202              | BioLegend             |
| CCR6                      | G034E3     | bl353402            | BioLegend             |
| CD103                     | B-Ly7      | 14-1038-82          | eBioscience           |
| CD69                      | FN50       | bl310902            | BioLegend             |
| KLRG1                     | 13F12F2    | ebio16-9488-85      | eBioscience           |
| CLA                       | HECA-452   | bl321302            | BioLegend             |
| CXCR3                     | 49801      | MAB160-100          | R&D                   |
| CD45RA                    | H100       | bd555486            | BD                    |
| PD-1                      | J105       | 14-2799-80          | invitrogen            |
| CD161                     | HP-3G10    | bl339902            | BioLegend             |
| CD127                     | A019D5     | bl351302            | BioLegend             |
| CD39                      | A1         | bl328202            | BioLegend             |
| CCR5                      | RF8B2      | 566191              | Genetex               |
| CCR7                      | 150503     | MAB197              | R&D                   |
| CD25                      | M-A251     | bl356102            | BioLegend             |
| CD28                      | CD28.2     | bl302914            | BioLegend             |
| CD71                      | CY1G4      | bl334102            | BioLegend             |
| CD38                      | HIT2       | bl303502            | BioLegend             |
| CCR4                      | L291H4     | bl359402            | BioLegend             |
| Perforin                  | B-D48      | ab47225             | Abcam                 |
| CD16                      | T24/31     | BE0212              | Standard BioTools Inc |
| DNA                       | Ir-191/193 | DNA                 | Standard BioTools Inc |
| CisPlatin live/dead       | Pt-195     | CisPlatin live/dead | Sigma                 |

<sup>1</sup>anti-TCR $\gamma$  $\delta$  is the PE-labelled primary antibody. <sup>2</sup> secondary antibody: anti-PE.

Table S5. R Packages Used for Analysis

| Analysis               | R Packages used        |
|------------------------|------------------------|
| CMI                    | R 4.3.0                |
|                        | renv 1.0.0             |
|                        | tidyverse 2.0.0        |
|                        | DT 0.28                |
|                        | plyr 1.8.8             |
|                        | dplyr 1.1.2            |
|                        | plotly 4.10.2          |
|                        | openxlsx 4.2.5.2       |
|                        | readxl 1.4.3           |
|                        | viridis 0.6.4          |
|                        | scales 1.2.1           |
|                        | data.table 1.14.8      |
|                        | patchwork 1.1.2        |
|                        | formattable 0.2.1      |
|                        | EnvStats 2.8.0         |
|                        | ggforce 0.4.1          |
|                        | ggh4x 0.2.5            |
|                        | gghighlight 0.4.0      |
|                        | ggribes 0.5.4          |
|                        | ggbeeswarm 0.7.2       |
|                        | ggthemes 4.2.4         |
|                        | gridExtra 2.3          |
|                        | testthat 3.1.10        |
|                        | shiny 1.7.4.1          |
|                        | shinythemes 1.2.0      |
|                        | shinyWidgets 0.7.6     |
|                        | plotlywrappers 0.1.0   |
| Correlation analysis   | R 4.0.4                |
|                        | shiny 1.7.1            |
|                        | tidyverse 1.3.1        |
|                        | DT 0.19                |
|                        | plotly 4.9.4.1         |
|                        | scales 1.1.1           |
|                        | EnvStats 2.4.0         |
|                        | heatmaply 1.3.0        |
|                        | reshape2 1.4.4         |
|                        | readxl 1.3.1           |
|                        | ggribes 0.5.3          |
|                        | viridis 0.6.1          |
|                        | ggthemes 4.2.4         |
|                        | corrplot 0.92          |
|                        | xlsx 0.6.5             |
| Cytokine Volcano Plots | dplyr 1.0.7            |
|                        | R version 4.2.2        |
|                        | stringr 1.5.0          |
|                        | tidyverse 1.3.2        |
|                        | EnhancedVolcano 1.16.0 |
|                        | yaml 2.3.7             |

| Analysis                     | R Packages used  |
|------------------------------|------------------|
|                              | readxl 1.4.1     |
|                              | dplyr 1.1.0      |
|                              | rstatix 0.7.2    |
|                              | openxlsx 4.2.5.1 |
|                              | renv 0.17.0      |
| CMI, cell mediated immunity. |                  |



**Table S6.** Differentially Expressed Genes Between Different Days and CVnCoV Dose Level Groups

| Dose group A | Dose group B | Analysis | Day X | Day Y | Numbers of differentially expressed genes |
|--------------|--------------|----------|-------|-------|-------------------------------------------|
| 2 µg         | 2 µg         | A2       | D29   | D1    | 48                                        |
| 2 µg         | 2 µg         | A2       | D2    | D1    | 9586                                      |
| 2 µg         | 2 µg         | A2       | D30   | D1    | 8985                                      |
| 2 µg         | 2 µg         | A2       | D30   | D29   | 8877                                      |
| 2 µg         | 2 µg         | A2       | D36   | D1    | 58                                        |
| 2 µg         | 2 µg         | A2       | D36   | D29   | 234                                       |
| 2 µg         | 2 µg         | A2       | D8    | D1    | 53                                        |
| 12 µg        | 12 µg        | A3       | D29   | D1    | 51                                        |
| 12 µg        | 12 µg        | A3       | D2    | D1    | 16250                                     |
| 12 µg        | 12 µg        | A3       | D30   | D1    | 16100                                     |
| 12 µg        | 12 µg        | A3       | D30   | D29   | 15668                                     |
| 12 µg        | 12 µg        | A3       | D36   | D1    | 207                                       |
| 12 µg        | 12 µg        | A3       | D36   | D29   | 534                                       |
| 12 µg        | 12 µg        | A3       | D8    | D1    | 1879                                      |
| 20 µg        | 20 µg        | A4       | D29   | D1    | 58                                        |
| 20 µg        | 20 µg        | A4       | D2    | D1    | 14355                                     |
| 20 µg        | 20 µg        | A4       | D30   | D1    | 14501                                     |
| 20 µg        | 20 µg        | A4       | D30   | D29   | 15442                                     |
| 20 µg        | 20 µg        | A4       | D36   | D1    | 868                                       |
| 20 µg        | 20 µg        | A4       | D36   | D29   | 833                                       |
| 20 µg        | 20 µg        | A4       | D8    | D1    | 559                                       |
| 2 µg         | 12 µg        | A5       | D1    | D1    | 6                                         |
| 2 µg         | 12 µg        | A5       | D2    | D2    | 3132                                      |
| 2 µg         | 12 µg        | A5       | D29   | D29   | 0                                         |
| 2 µg         | 12 µg        | A5       | D30   | D30   | 3677                                      |
| 2 µg         | 12 µg        | A5       | D36   | D36   | 0                                         |
| 2 µg         | 12 µg        | A5       | D8    | D8    | 501                                       |
| 2 µg         | 20 µg        | A6       | D1    | D1    | 3                                         |
| 2 µg         | 20 µg        | A6       | D2    | D2    | 6433                                      |
| 2 µg         | 20 µg        | A6       | D29   | D29   | 5                                         |
| 2 µg         | 20 µg        | A6       | D30   | D30   | 6587                                      |
| 2 µg         | 20 µg        | A6       | D36   | D36   | 10                                        |
| 2 µg         | 20 µg        | A6       | D8    | D8    | 1                                         |
| 12 µg        | 20 µg        | A7       | D1    | D1    | 8                                         |
| 12 µg        | 20 µg        | A7       | D2    | D2    | 0                                         |
| 12 µg        | 20 µg        | A7       | D29   | D29   | 1                                         |
| 12 µg        | 20 µg        | A7       | D30   | D30   | 2                                         |
| 12 µg        | 20 µg        | A7       | D36   | D36   | 1                                         |
| 12 µg        | 20 µg        | A7       | D8    | D8    | 0                                         |

Numbers of significantly differentially expressed genes (DEGs) between different Days (D) X and Y or CVnCoV dose groups A and B. Significant with adjusted p-value <0.05. Analysis from at least n=11 SARS-CoV-2 seronegative participants per dose group and timepoint. For participants who did not receive a second CVnCoV dose, Day 30 and 36 timepoint values were excluded from analysis.

n, number of participants

**Table S7.** Frequencies of SARS-CoV-2 Spike-Specific CD8<sup>+</sup> T Cells in Longitudinal Samples from CVnCoV Vaccinated Participants from CV-NCOV-001 and CV-NCOV-002 Trials

| <b>CV-NCOV-001</b>                                   | <b>Day 1</b> | <b>Day 29</b> | <b>Day 36</b> |
|------------------------------------------------------|--------------|---------------|---------------|
| Participant samples tested (n)                       | 20           | 18            | 20            |
| Participant samples with hits (n)                    | 1            | 7             | 15            |
| Number of hits                                       | 1            | 7             | 18            |
| Participants with different hits on the same day (n) | 0            | 0             | 3             |
| <b>CV-NCOV-002</b>                                   | <b>Day 1</b> | <b>Day 29</b> | <b>Day 43</b> |
| Participant samples tested (n)                       | 24           | 21            | 21            |
| Participant samples with hits (n)                    | 0            | 10            | 9             |
| Number of hits                                       | 0            | 10            | 9             |
| Participants with different hits on the same day (n) | 0            | 0             | 0             |

A hit is defined as the detection of a SARS-CoV-2 spike derived tetramer-binding CD8<sup>+</sup> T cell.

For CV-NCOV-001, a total of 22 participants were included in the analysis, but 2 baseline samples were not available. For 1 participant who was tested seronegative for SARS-CoV-2, there was a hit detected on baseline. For CV-NCOV-002, a total of 24 participants were included in the analysis.

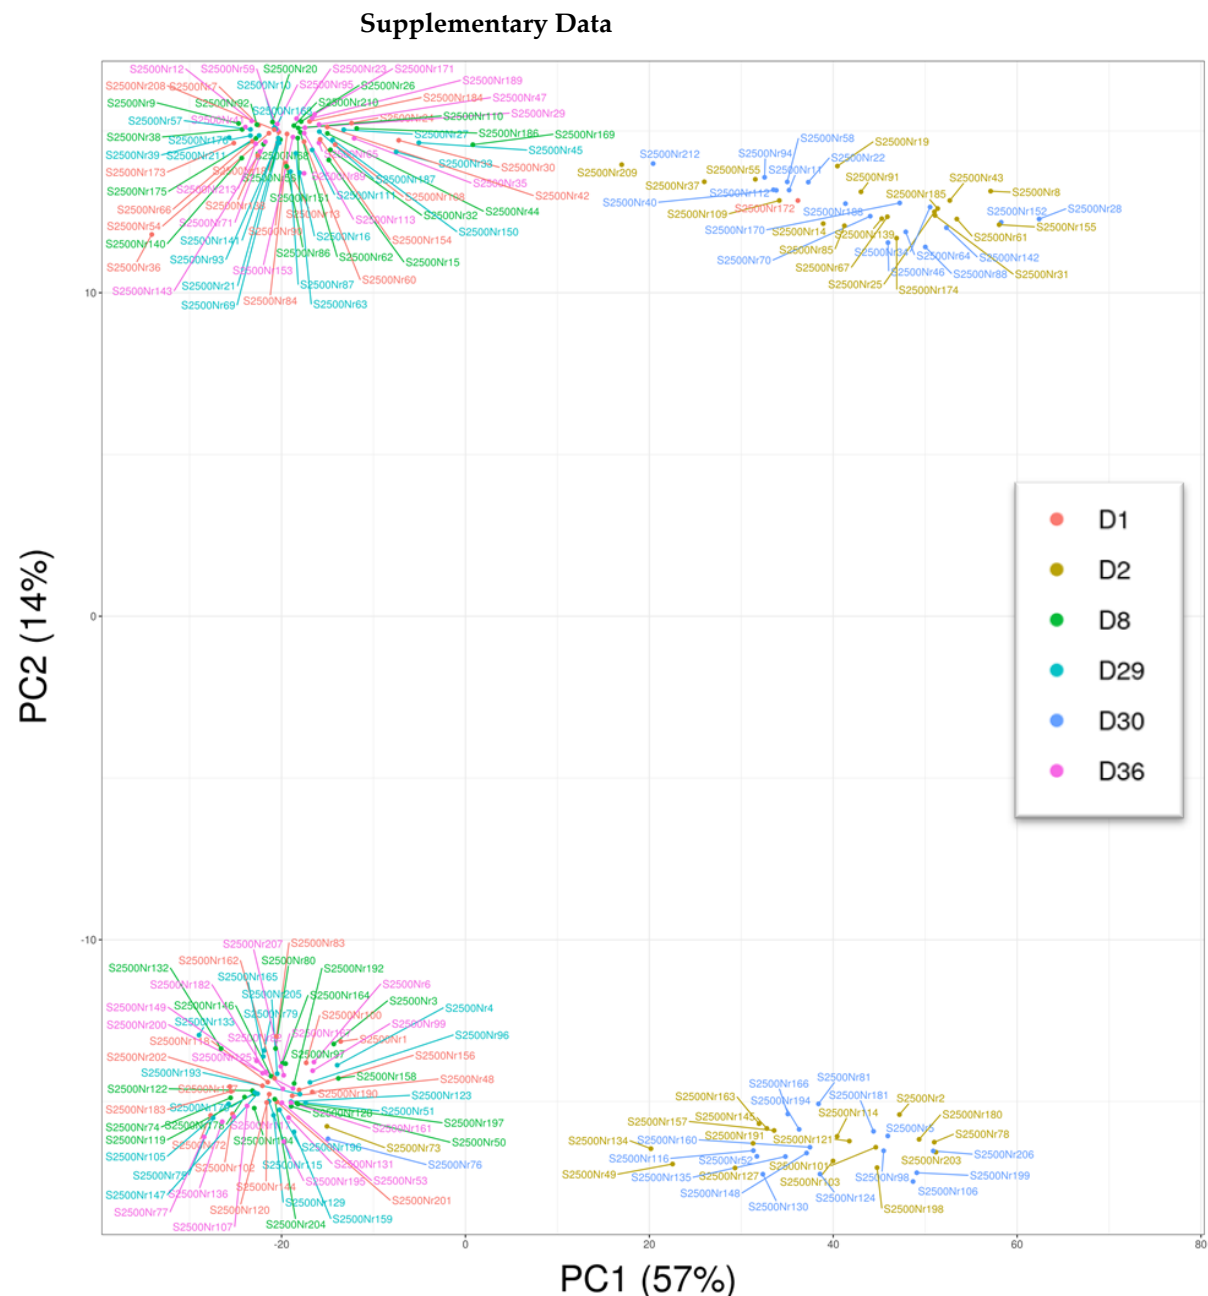

**Figure S1.** Principal Component Analysis of Gene Expression Data. Principal component analysis (PCA) from expression data of genes with at least two sequencing reads. The percentage values on the axes describe how much of the variance between samples is captured in this principal component (PC). Samples (S) (n=210) are colored according to Days (D) group and are from SARS-CoV-2 seronegative participants vaccinated with 2, 12 or 20 µg doses of CVnCoV. For participants who did not receive a second CVnCoV dose, Day 30 and 36 timepoint values were excluded from analysis.

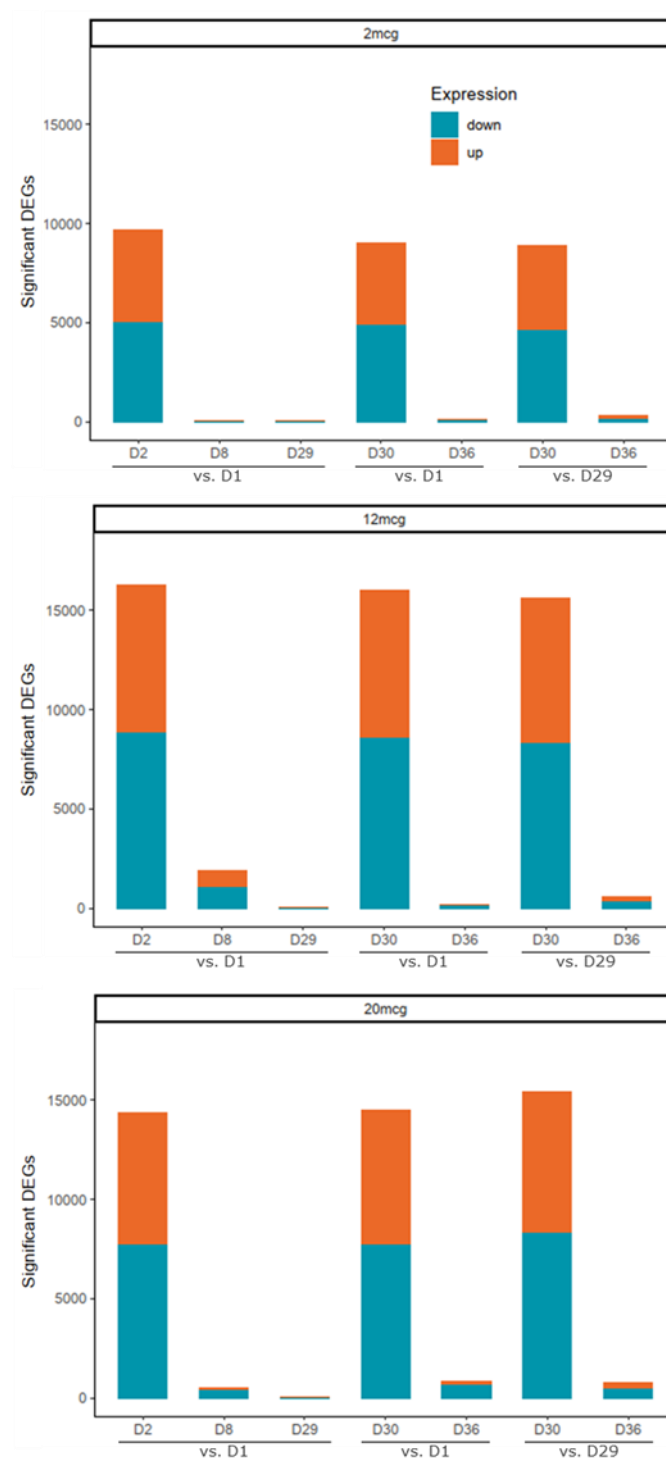

**Figure S2.** Significantly Differentially Expressed Genes Between Different Time Points per CVnCoV Dose Group. Numbers of significantly differentially expressed genes (DEGs) between different Days (D) per dose group (from top to bottom 2, 12 and 20 µg of CVnCoV). Significance level for adjusted p-value <0.05; downregulated DEGs in turquoise and upregulated in orange. Analysis from at least n=11 per dose group who were SARS-CoV-2 seronegative at shown timepoints. For participants who did not receive a second CVnCoV dose, Day 30 and 36 timepoint values were excluded from analysis.

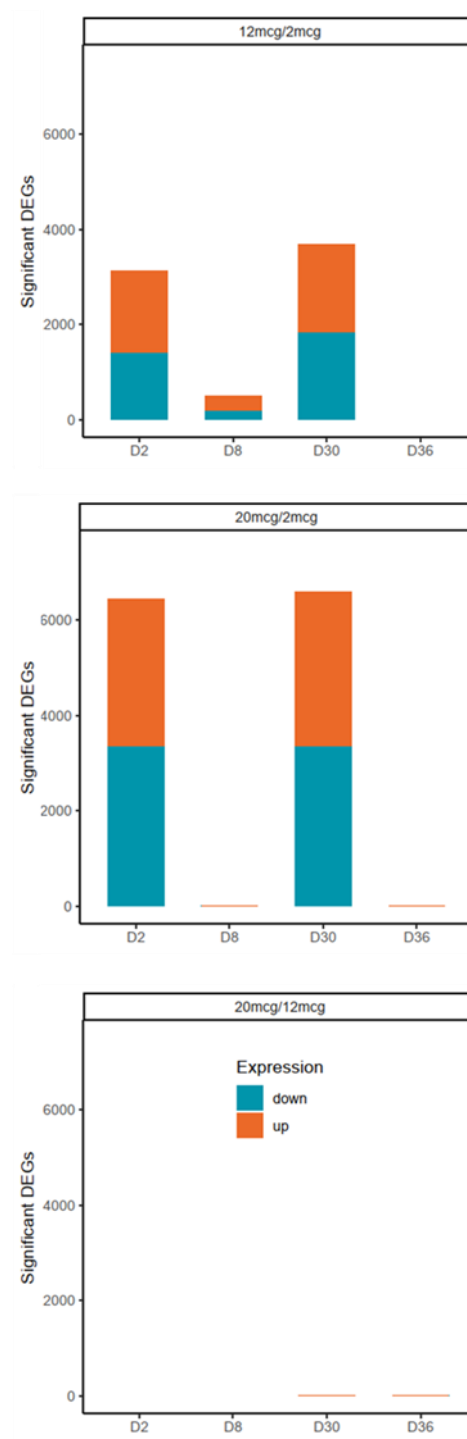

**Figure S3.** Significantly Differentially Expressed Genes on Different Days Between CVnCoV Dose Group. Numbers of significantly differentially expressed genes (DEGs) between different CVnCoV dose groups (from top to bottom: 12 vs. 2  $\mu$ g, 20 vs. 2  $\mu$ g and 20 vs. 12  $\mu$ g) on one Day (D). Significance level for adjusted p-value <0.05; downregulated DEGs in turquoise and upregulated in orange. Analysis from at least n=11 per dose group who were SARS-CoV-2 seronegative at shown timepoints. For participants who did not receive a second CVnCoV dose, Day 30 and 36 timepoint values were excluded from analysis.

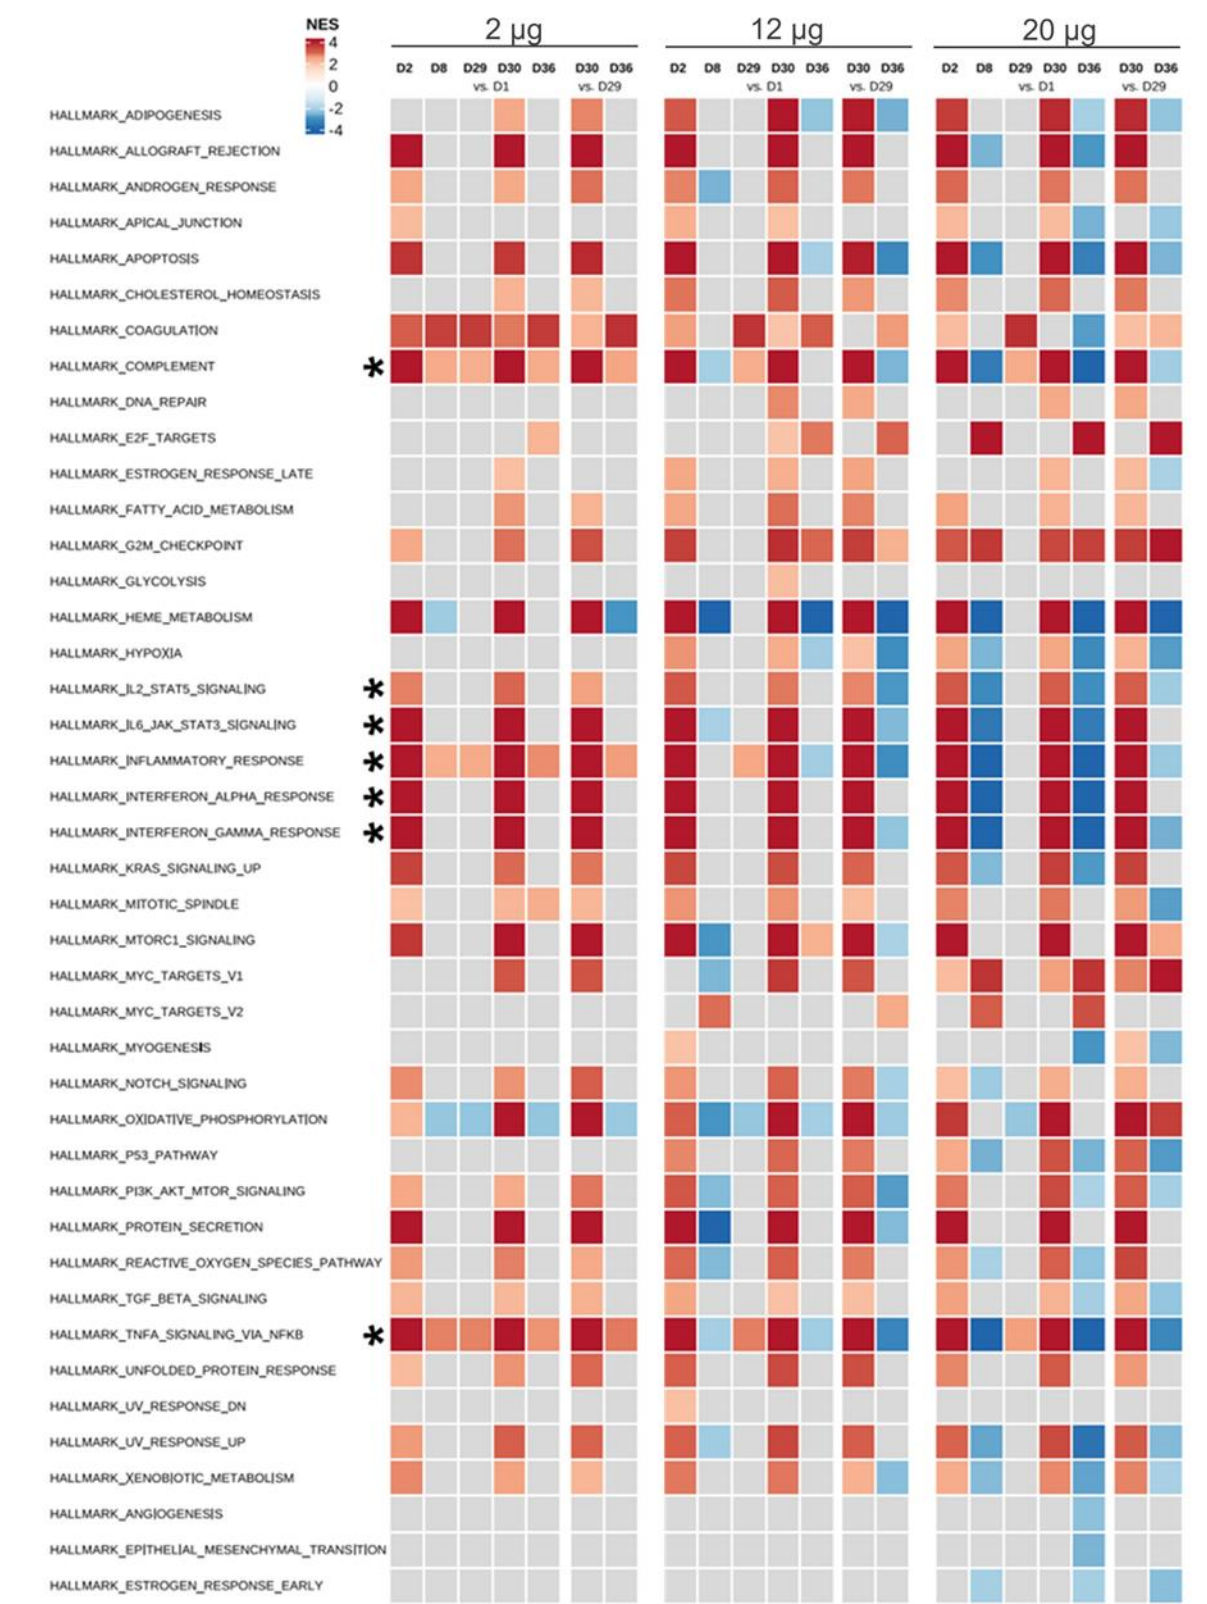

**Figure S4.** GSEA with HALLMARK Gene Sets After CVnCoV Vaccination. Gene set enrichment analysis (GSEA) from significantly differentially expressed genes (DEGs) summarized by HALLMARK gene sets. Analysis from at least n=11 participants per 2, 12 or 20 µg CVnCoV dose group who were SARS-CoV-2 seronegative at shown timepoints (CV-NCOV-001). For participants who did not receive a second CVnCoV dose, Day 30 and 36 timepoint values were excluded from analysis. Normalized enrichment score (NES) in grey when not enriched in GSEA or with non-significant false discovery rate (FDR > 0.01); colored NES indicates significance with FDR <0.01, red with positive score indicates upregulation and blue (negative score) downregulation of listed gene sets between compared groups. \* indicates gene sets related to inflammatory processes.

D, Day; IL, interleukin; KRAS, 15kirsten rat sarcoma viral oncogene homolog; MYC, myelocytomatosis oncogene; n, number of participants; NFkB, nuclear factor kappa B; TGF, tumor growth factor; TNFA, tumor necrosis factor alpha.

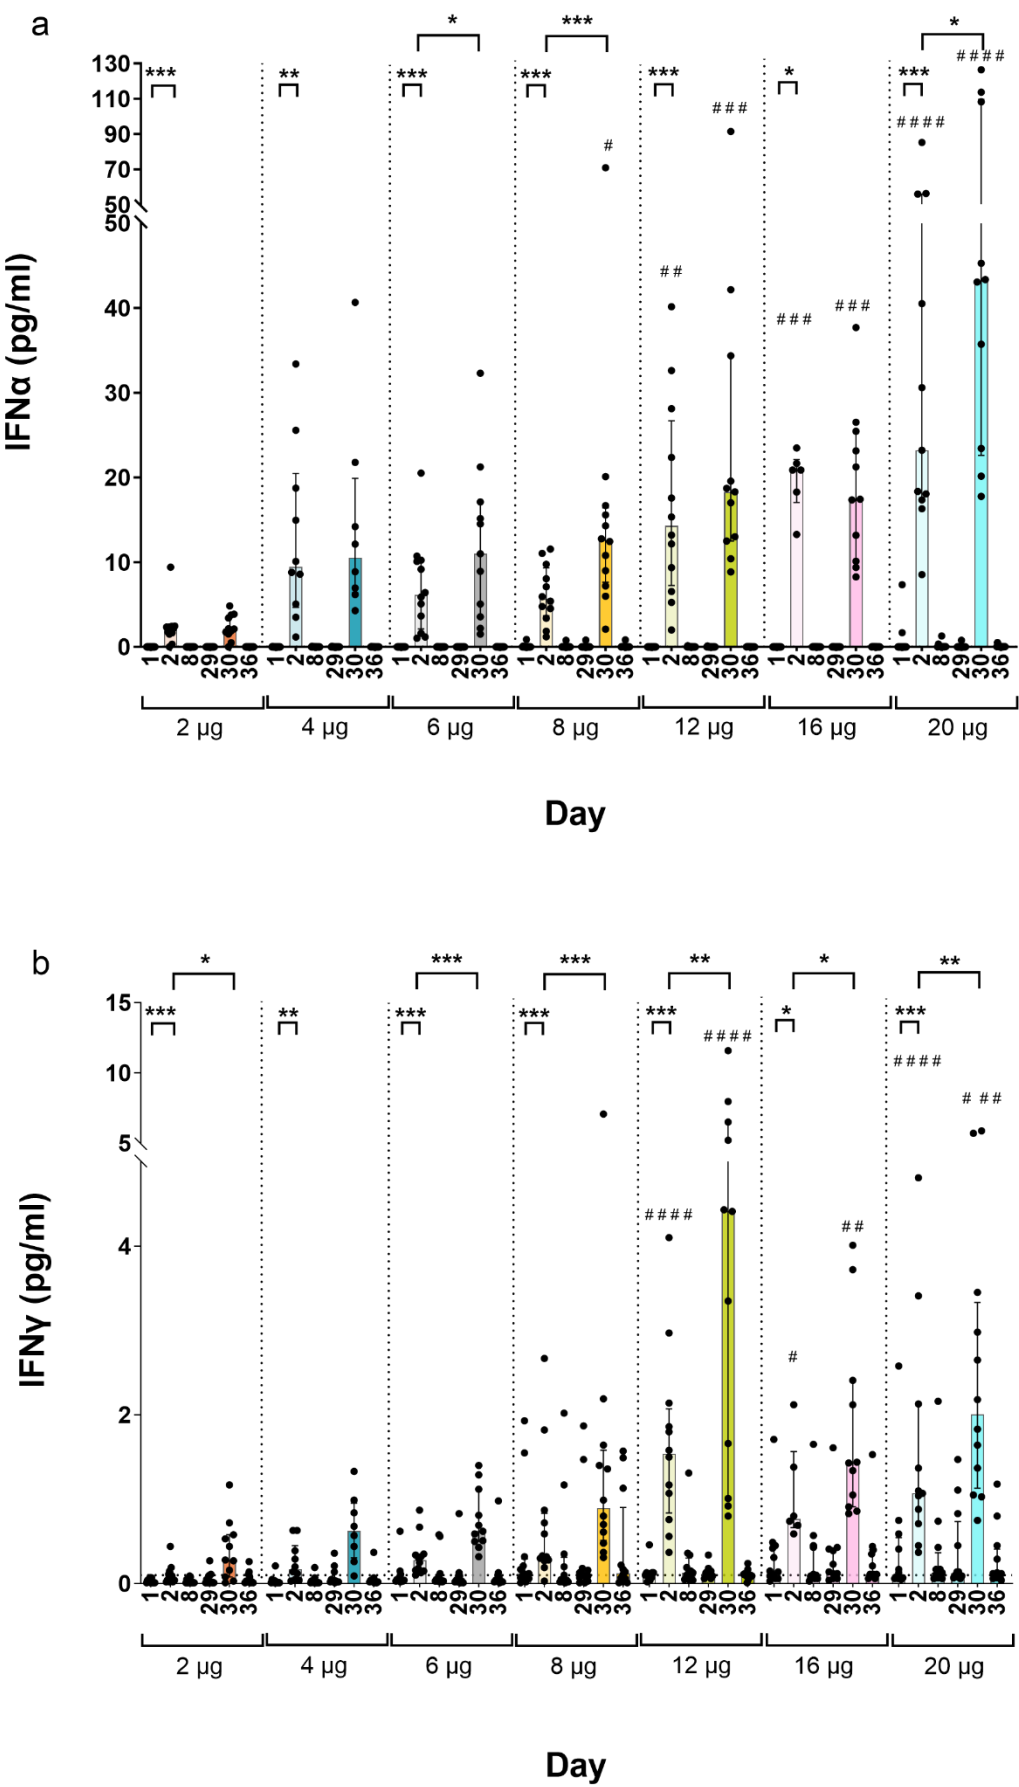



**Figure S5.** Serum Interferon Concentration by Dose and Trial Visit. IFN $\alpha$  (a) and IFN $\gamma$  (b) serum concentrations on Days 1, 2, 8, 29, 30 and 36 in SARS-CoV-2 seronegative participants vaccinated with two doses of 2, 4, 6, 8, 12, 16 or 20  $\mu$ g of CVnCoV (CV-NCOV-001). If participants did not receive a second CVnCoV dose, Day 30 and 36 values were excluded from analysis. Bars show median values with interquartile range. For IFN $\gamma$  (b), dotted line indicates the lower level of quantification (LLOQ). Values below LLOQ were reported as extrapolated value. Values below detection limit were set to the lowest extrapolated value reported for respective cytokine. Statistical comparisons in one dose group (indicated as \*) were analyzed using a two-tailed Wilcoxon signed-rank test and for Day 2 and Day 30 timepoints between dose groups using Kruskal-Wallis ANOVA with Dunn's multiple comparisons testing with 2  $\mu$ g as the reference (indicated as #). Significance is defined as: \*/#  $p \leq 0.05$ , \*\*/# #  $p \leq 0.01$ , \*\*\*/# # #  $p \leq 0.001$  or # # # #  $p \leq 0.0001$ .

IFN $\alpha$ , interferon alpha; IFN $\gamma$ , interferon gamma.

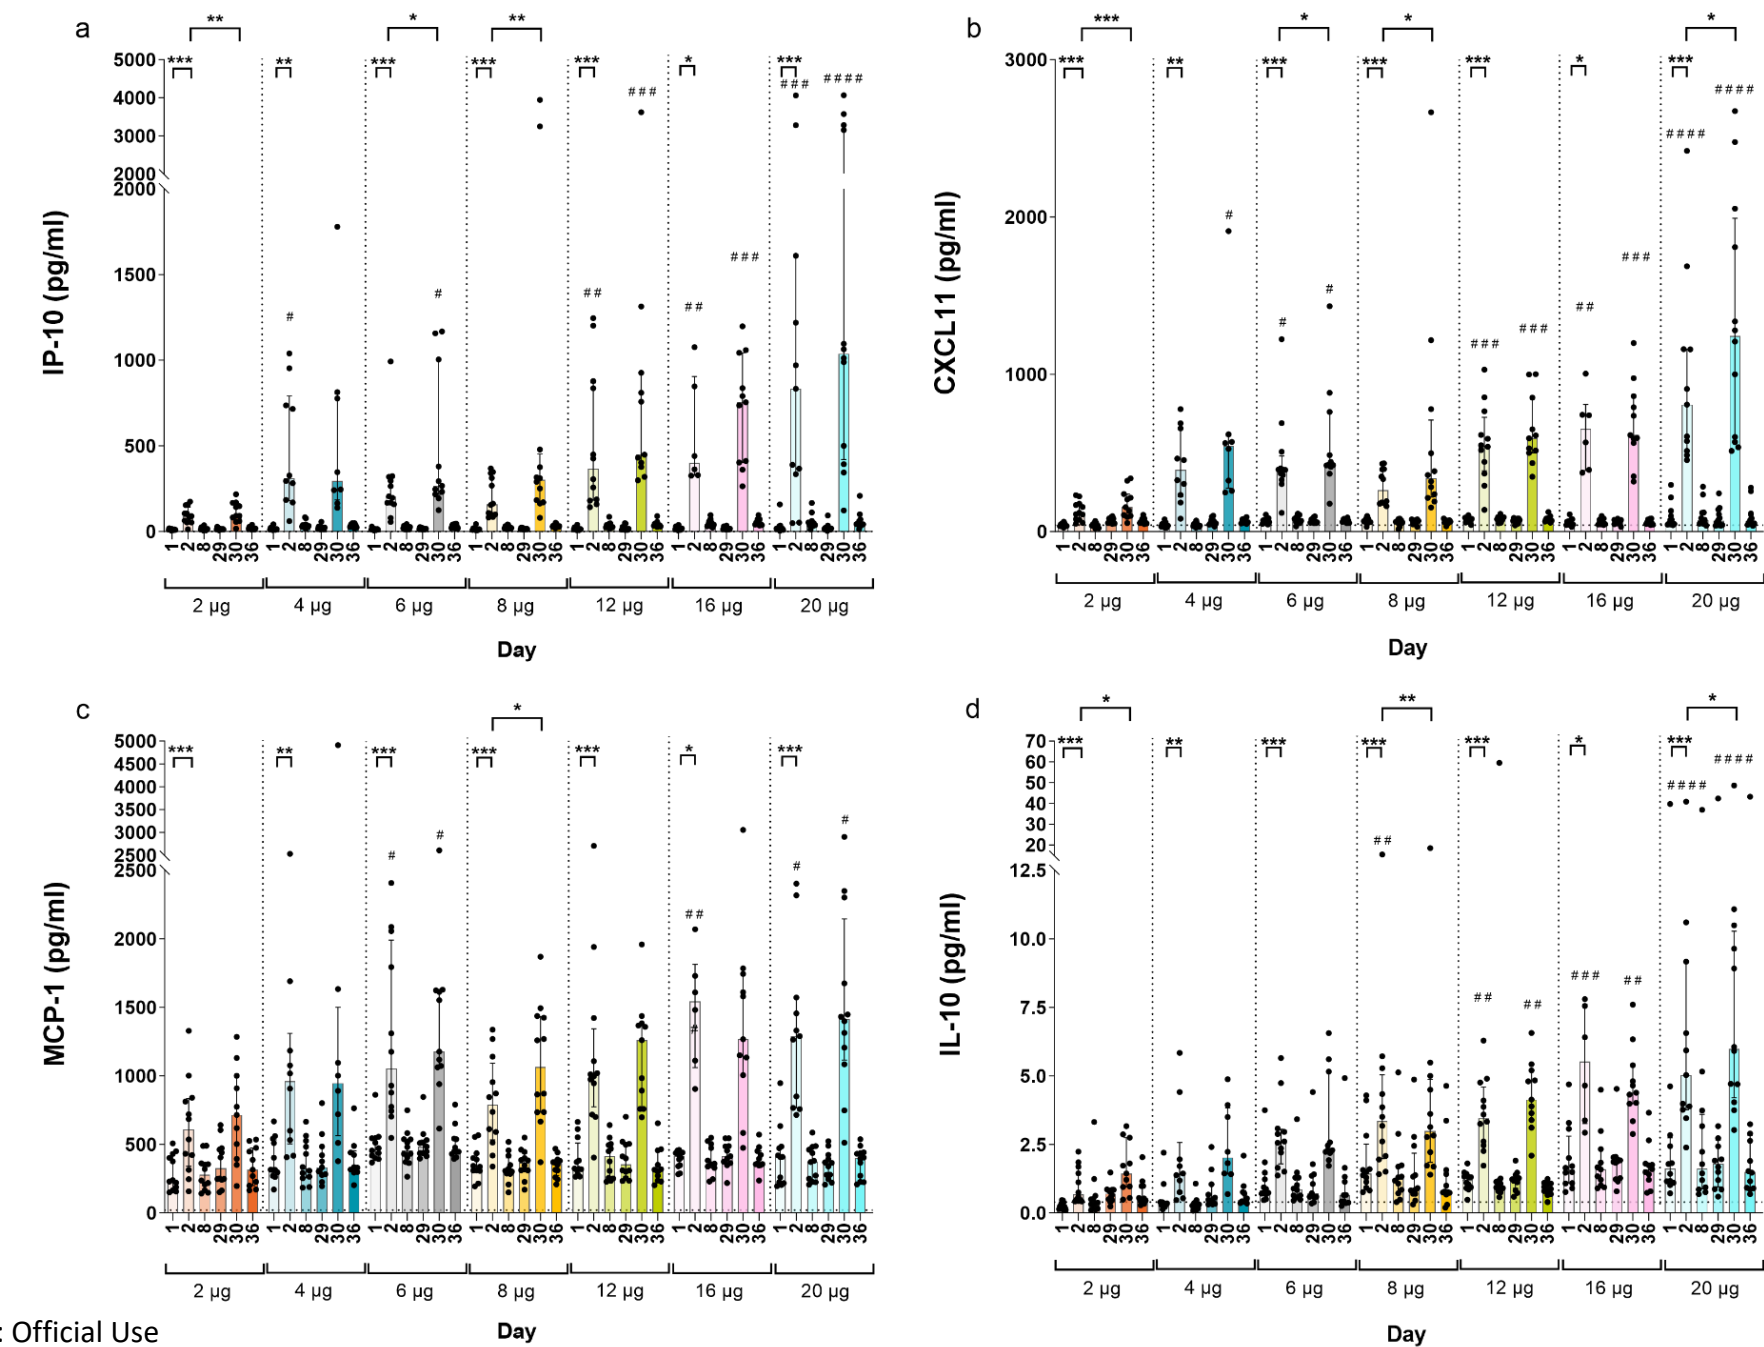

**Figure S6.** Induction of Serum Cytokines Post CVnCoV Vaccination. IP-10 (a), CXCL11 (b), MCP-1 (c) and IL-10 (d) serum concentrations on Days 1, 2, 8, 29, 30 and 36 in SARS-CoV-2 seronegative participants vaccinated with two CVnCoV doses of 2, 4, 6, 8, 12, 16 or 20 µg (CV-NCOV-001). If participants did not receive a second CVnCoV dose, Day 30 and 36 values were excluded from analysis. Bars show median values with interquartile range, dotted line indicates the lower level of quantification (LLOQ). Values below LLOQ were reported as extrapolated value. Values below detection limit were set to the lowest extrapolated value reported for respective cytokine. Statistical comparisons in one dose group (indicated as \*) were analyzed using a two-tailed Wilcoxon signed-rank test and for Day 2 and Day 30 timepoints between dose groups using Kruskal-Wallis ANOVA with Dunn's multiple comparisons testing with 2 µg as the reference (indicated as #). Significance is defined as: \*/#  $p \leq 0.05$ , \*\*/# #  $p \leq 0.01$ , \*\*\*/# # #  $p \leq 0.001$  or # # # #  $p \leq 0.0001$ .

CXCL, chemokine (C-X-C motif) ligand 1; IL-10, interleukin 10; IP-10, interferon-gamma inducible protein 10kDa; MCP-1, membrane cofactor protein.

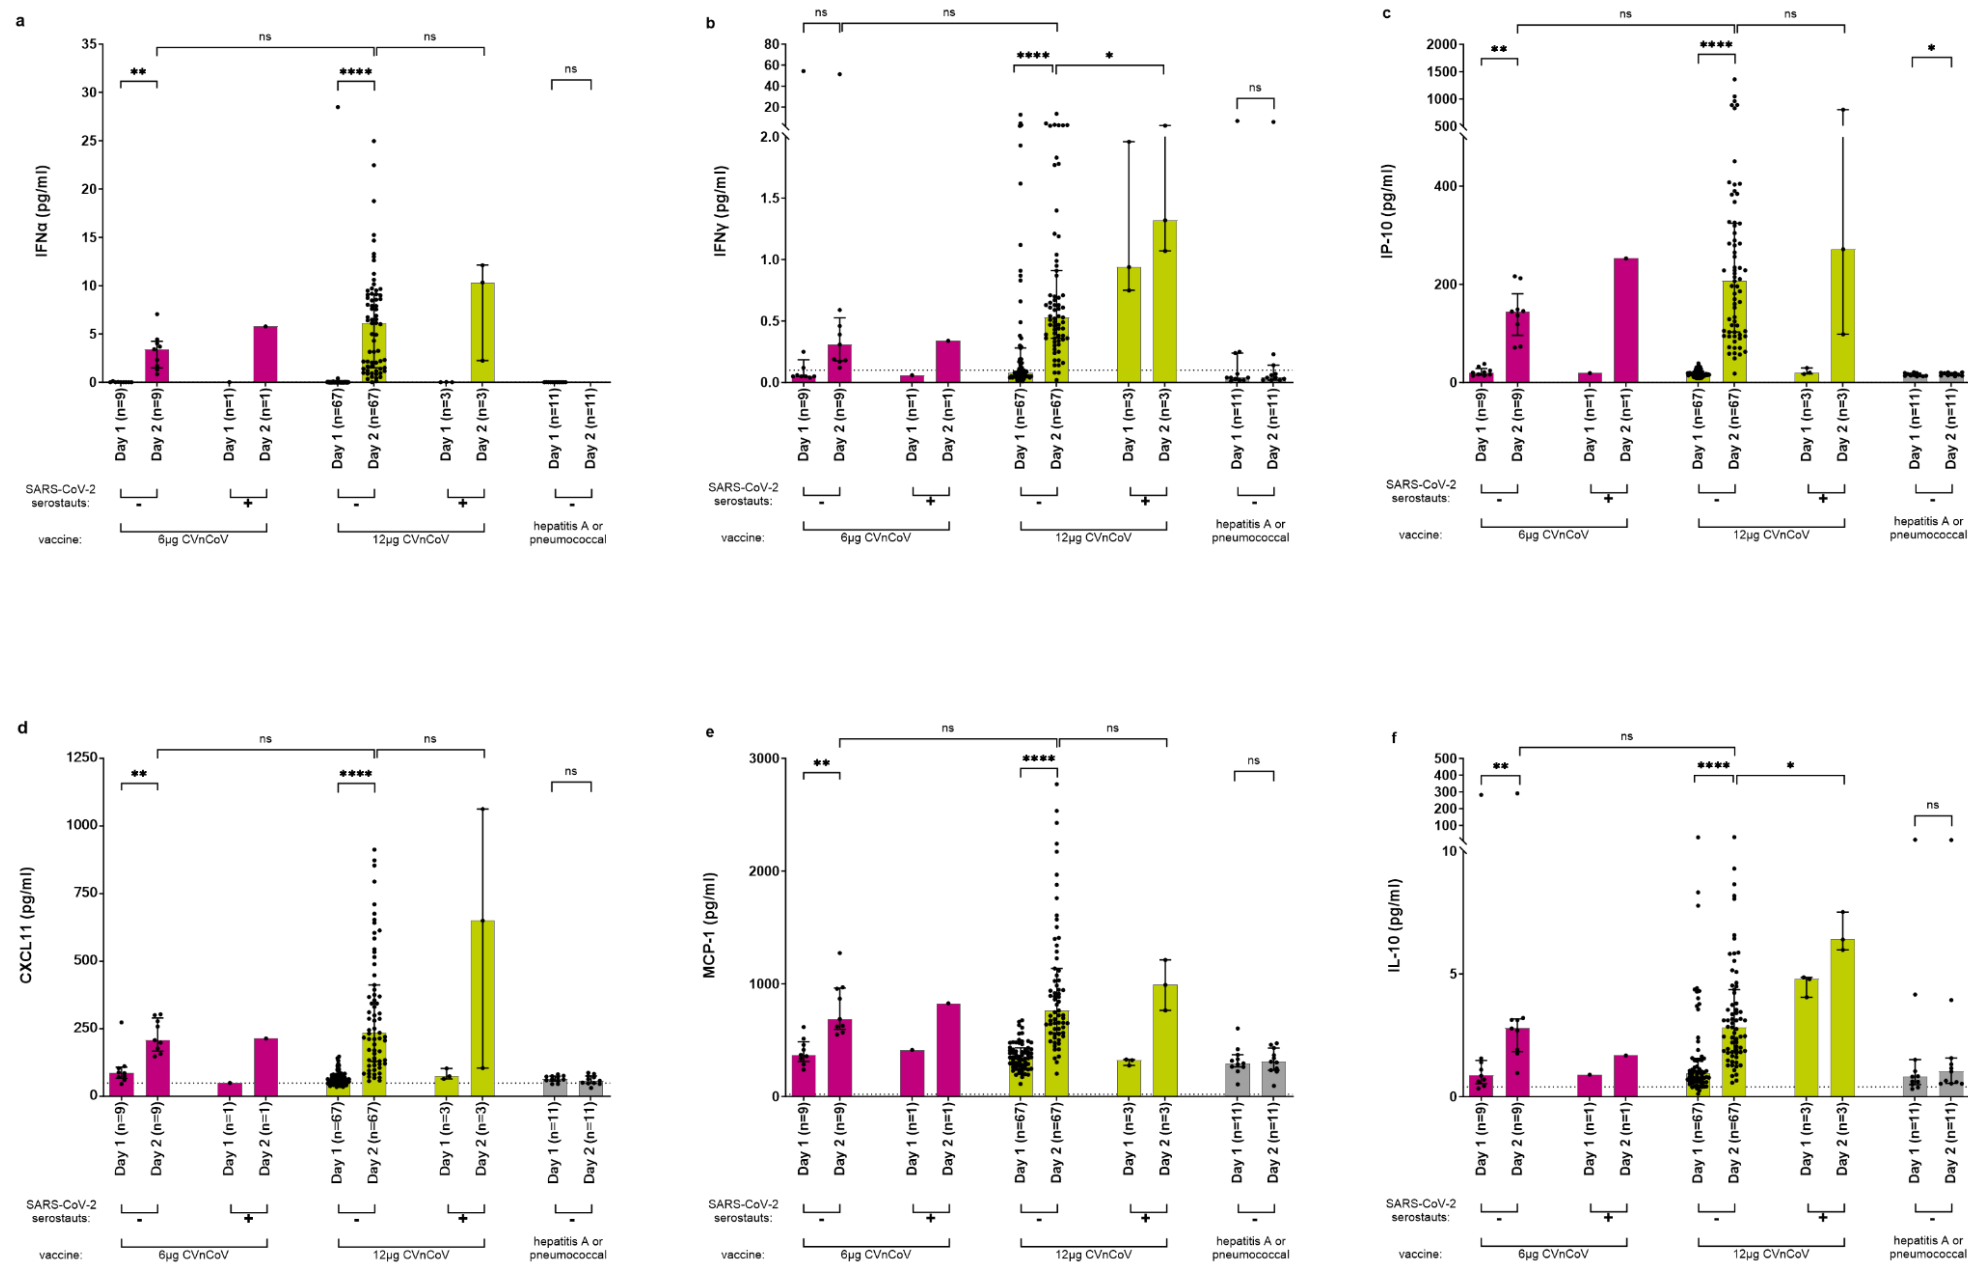

**Figure S7.** Serum Cytokine Concentrations Post CVnCoV Vaccination By SARS-CoV-2 Serostatus. CV-NCOV-002 cytokine serum concentrations on Day 1 and Day 2 in participants vaccinated with 6 or 12 µg of CVnCoV stratified by SARS-CoV-2 seronegative or seropositive serostatus and Active Control participants who received licensed hepatitis A or pneumococcal vaccine. Bars show median with interquartile range, dotted line indicates the lower level of quantification (LLOQ). Values below LLOQ were reported as extrapolated value. If no value was detected (below limit), the lowest extrapolated value for respective cytokine was used. Groups were compared using either a two-tailed Wilcoxon signed-rank test (pairwise comparison between Day 1 and 2 values in the same group) or by Mann-Whitney test (unpaired comparison between Day 2 values of distinct groups). Statistical significance was defined as: \*  $p \leq 0.05$ , \*\*  $p \leq 0.01$  or \*\*\*\*  $p \leq 0.0001$ ; not significant (ns)  $p > 0.05$ .

CXCL, chemokine (C-X-C motif) ligand 1; IFN $\alpha$ , interferon alpha; IFN $\gamma$ , interferon gamma; IL, interleukin; IP-10, interferon-gamma inducible protein 10kDa; MCP-1, membrane cofactor protein 1.

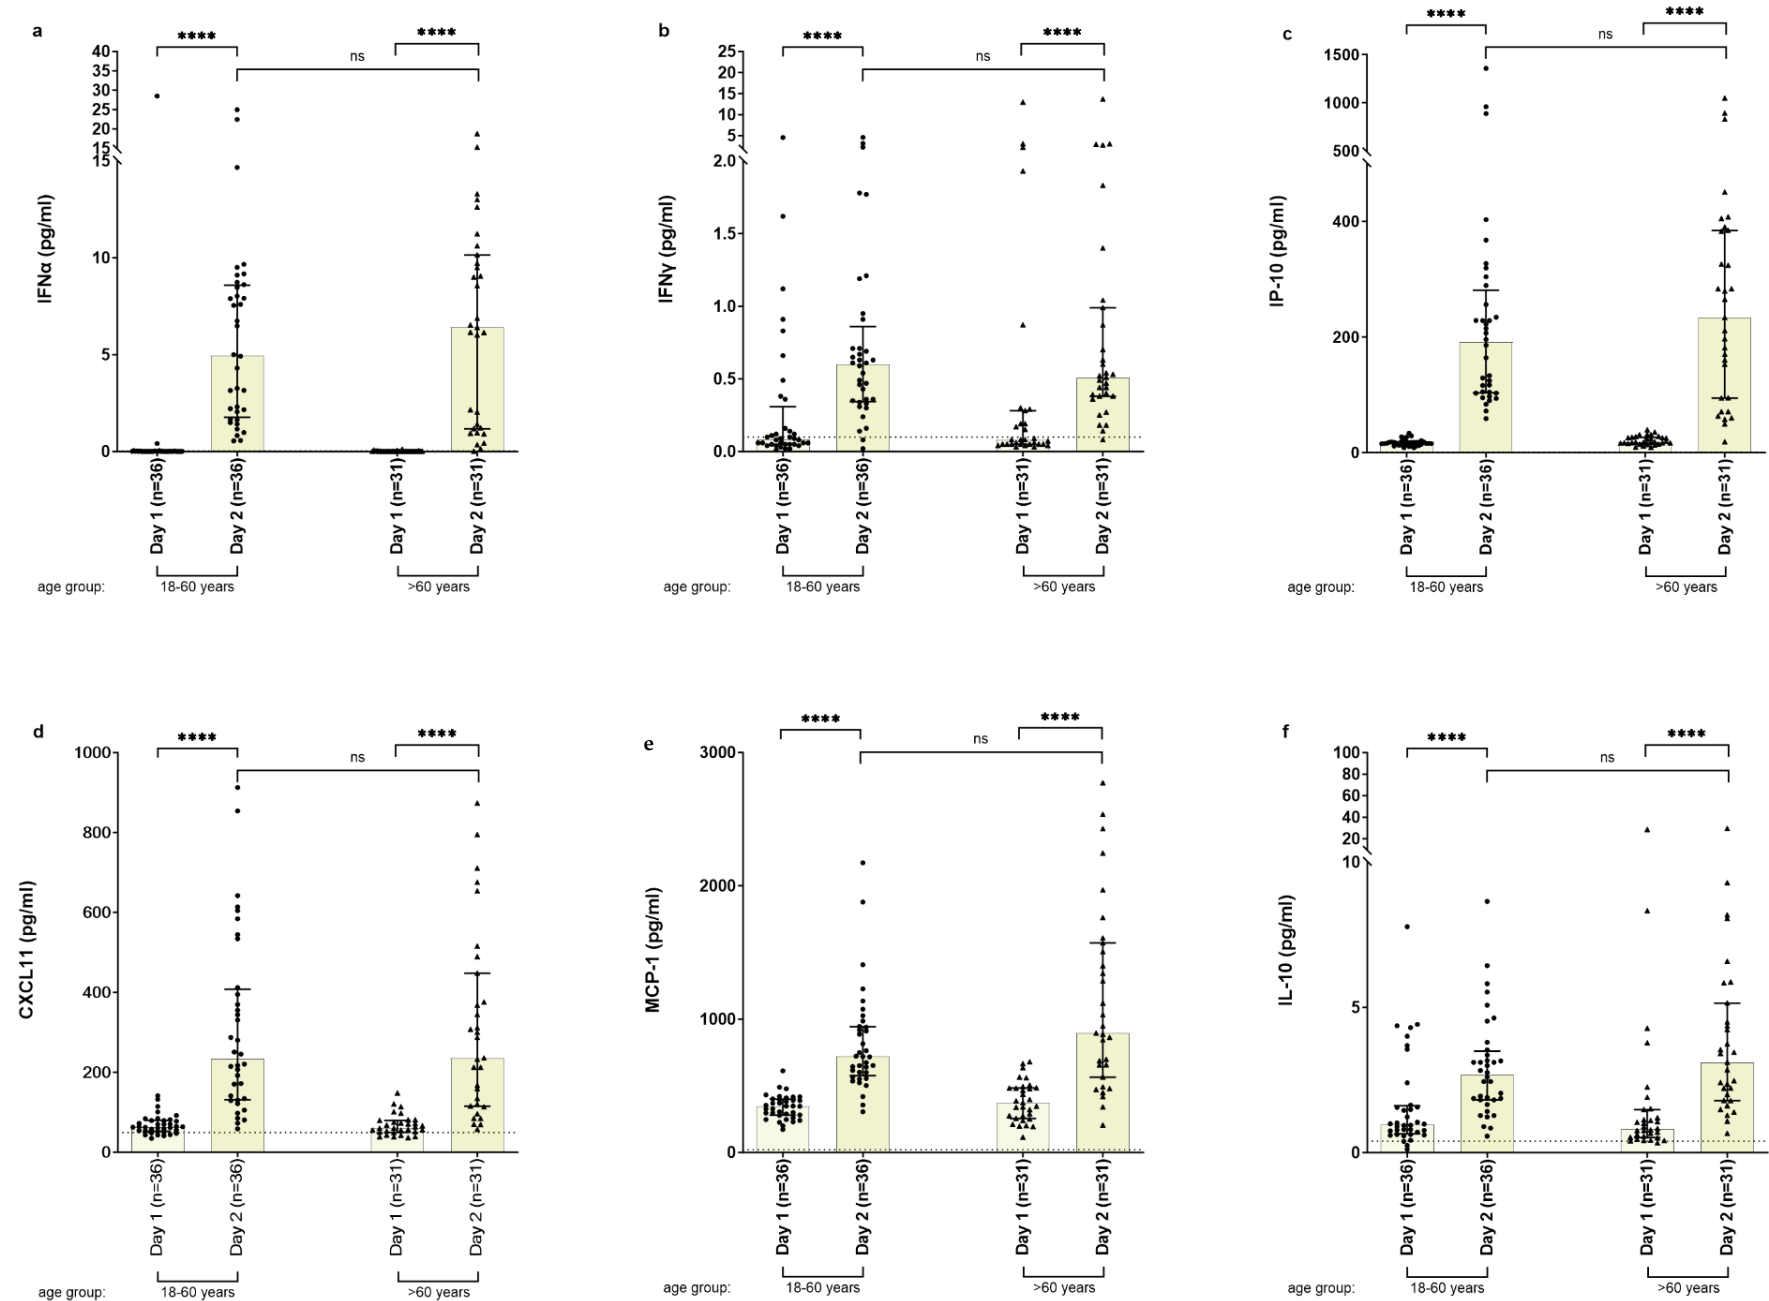

**Figure S8.** Serum Cytokine Concentrations by Trial Visit and Age Group. IFN $\alpha$  (a), IFN $\gamma$  (b), IP-10 (c), CXCL11 (d), MCP-1 (e) and IL-10 (f) serum concentrations on Day 1 and Day 2 in SARS-CoV-2 seronegative participants from CV-NCOV-002 trial. Participants administrated with a 12  $\mu$ g CVnCoV dose were stratified by younger (18–60 years of age) and older (over 60 years of age) groups. Bars show median values with interquartile range. Dotted lines indicate lower level of quantification (LLOQ). Values below LLOQ were reported as extrapolated value. If no value was detected (below limit), the lowest extrapolated value for respective cytokine was used. Groups were statistically compared using either a two-tailed Wilcoxon signed-rank test (pairwise comparison between Day 1 and 2 values in the same age group) or by Mann-Whitney test (unpaired comparison between Day 2 values of distinct age groups). Statistical significance was defined as: \*\*\*\*  $p \leq 0.0001$ ; not significant (ns) if  $p > 0.05$ .

CXCL, chemokine (C-X-C motif) ligand 1; IFN $\alpha$ , interferon alpha; IFN $\gamma$ , interferon gamma; IL-10, interleukin 10; IP-10, interferon-gamma inducible protein 10kDa; MCP-1, membrane cofactor protein 1; n, number of participants.

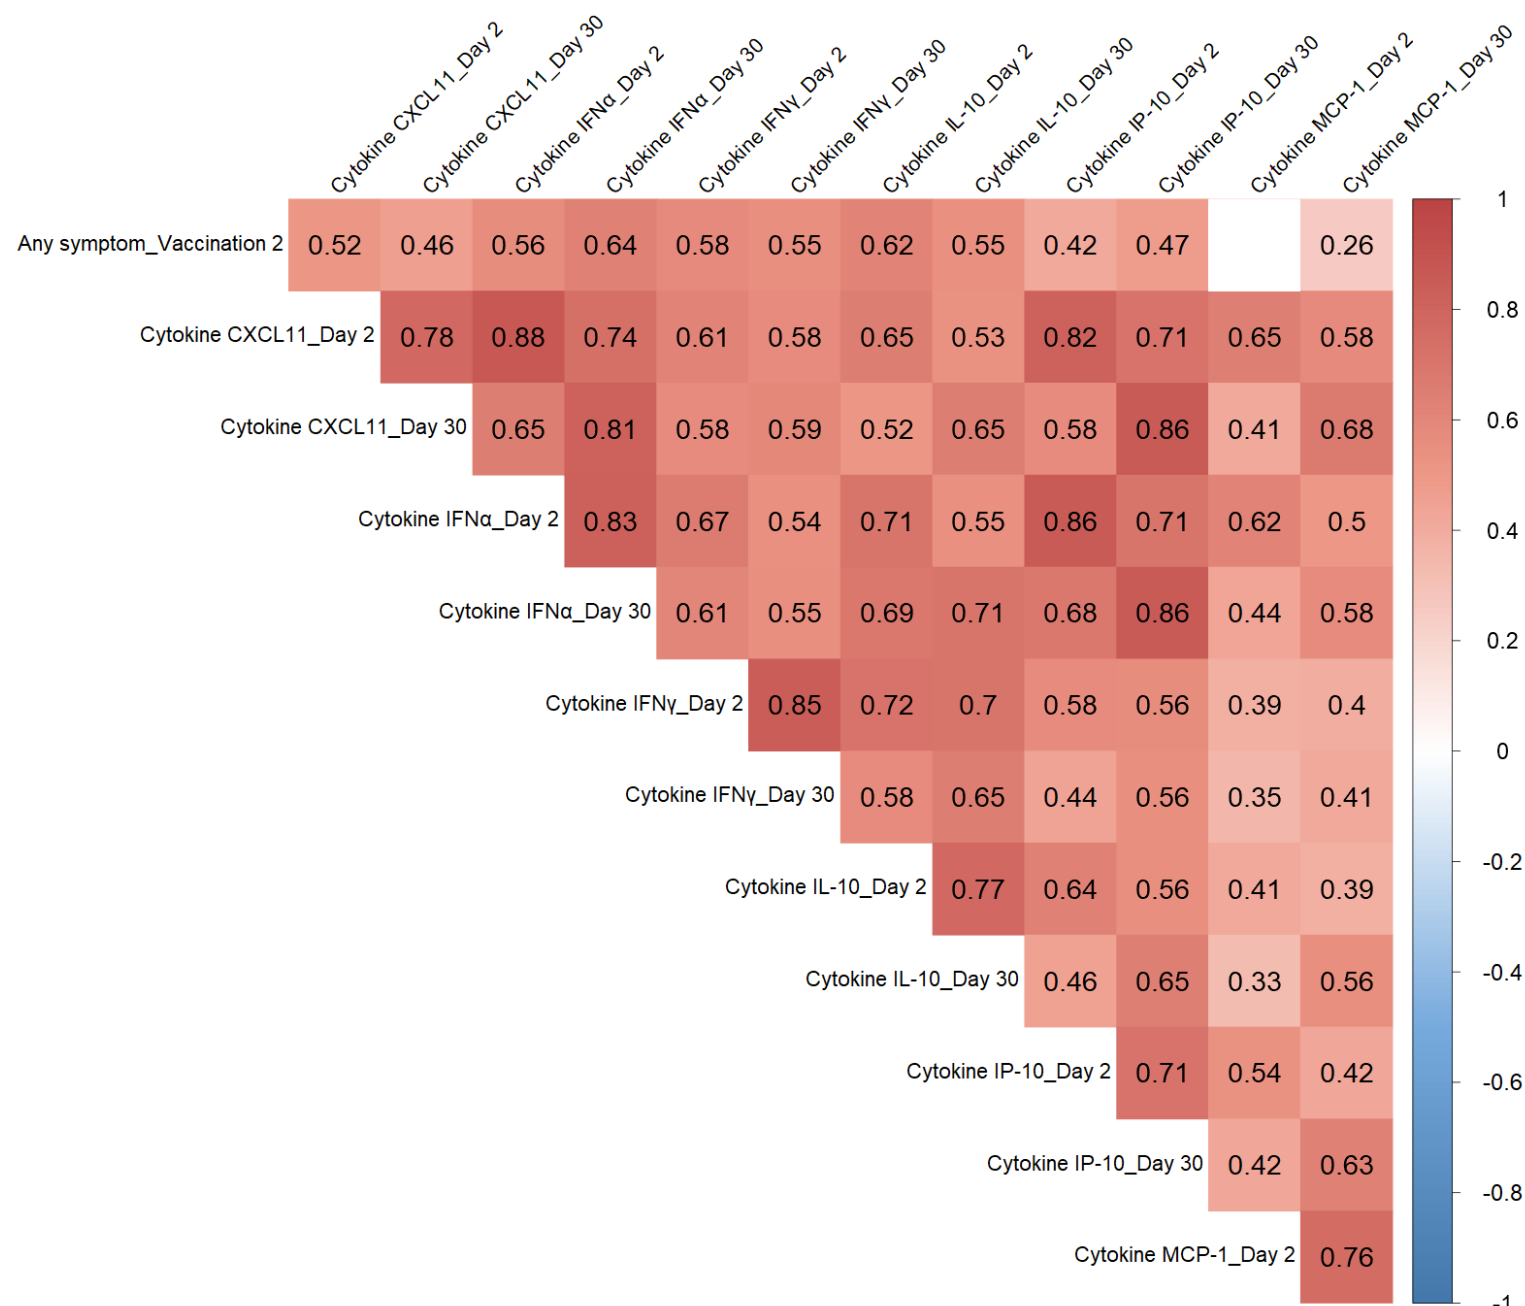

**Figure S9.** Correlation of Serum Cytokine Levels After First and Second Doses of CVnCoV Vaccine. Spearman correlation analysis from n=65 from a pool of CV-NCOV-001 participants who received both two doses of CVnCoV (2,4,6,8,12,16 or 20 µg) and who were SARS-CoV-2 seronegative for shown time points. Fields with significant  $p \leq 0.05$  are colored according to Spearman correlation coefficient. Reactogenicity was calculated per participant as maximum severity grade (0=absent, 1=mild, 2=moderate, 3=severe) of vaccine-related solicited adverse events (any local or systemic sign/symptom) after both doses. Analysis done with serum cytokine concentrations on indicated days.

CXCL, chemokine (C-X-C motif) ligand 1; IFN $\alpha$ , interferon alpha; IFN $\gamma$ , interferon gamma; IL-10, interleukin 10; IP-10, interferon-gamma inducible protein 10kDa; MCP-1, membrane cofactor protein 1; n, number of participants.



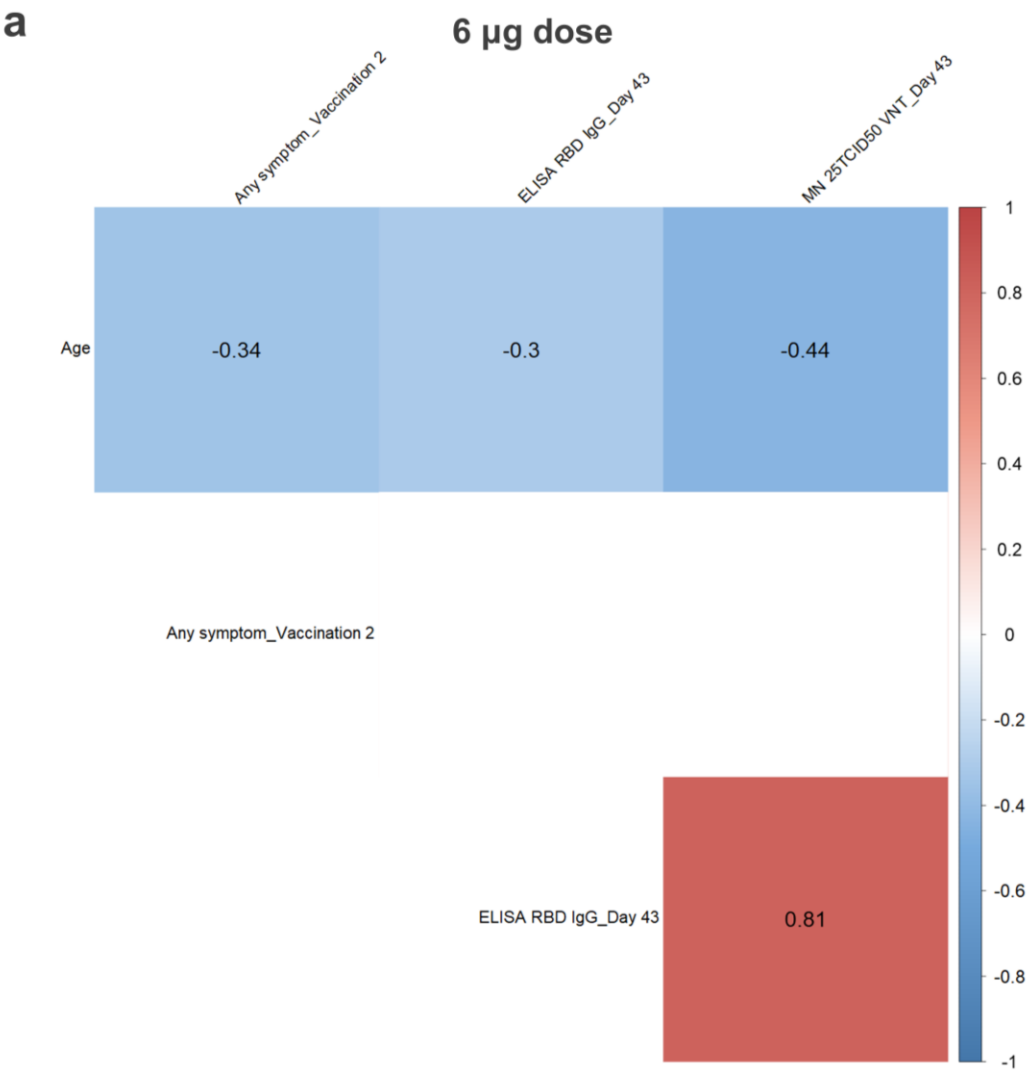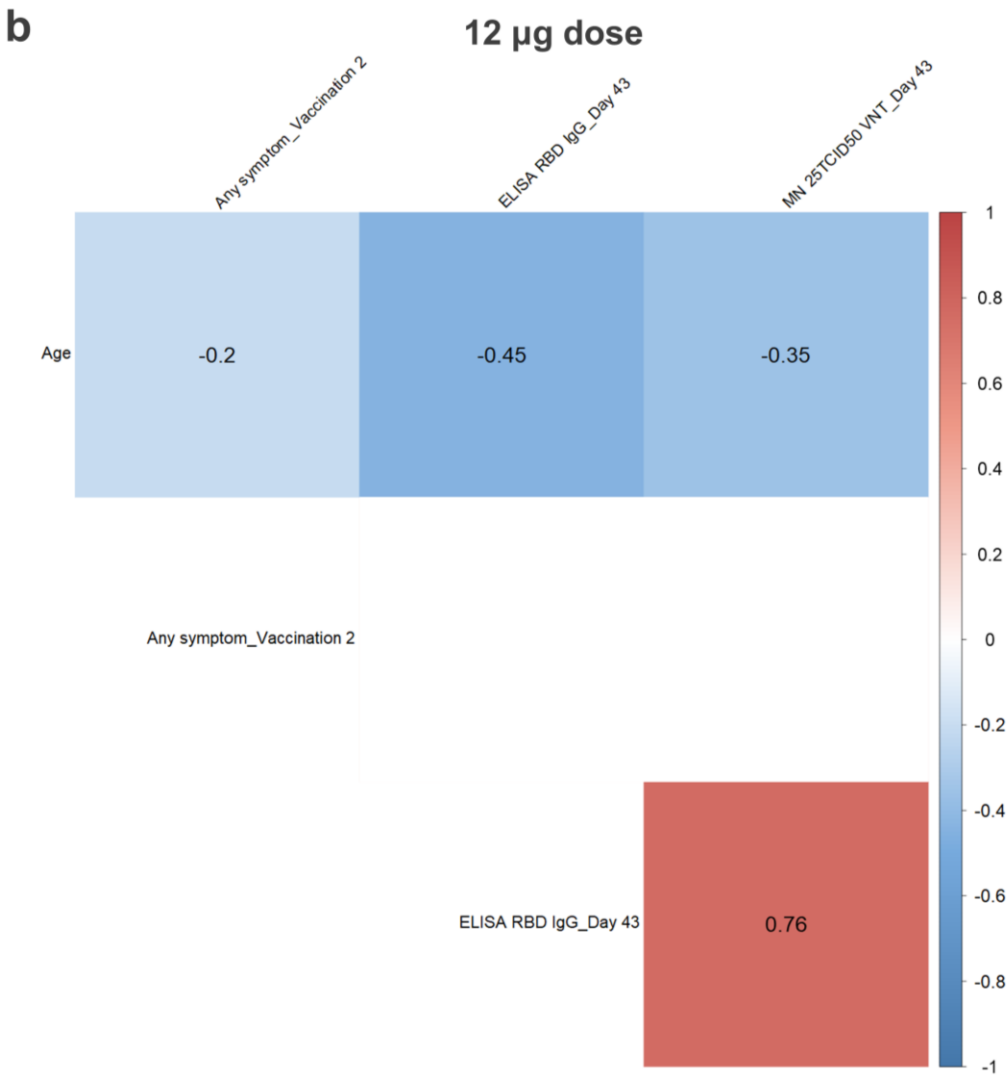

**Figure S10.** Correlation of CVnCoV Reactogenicity and Humoral Immunity with Participant's Age. Spearman correlation analysis from n=58 (a, 6 µg) and n=344 (b, 12 µg) pairs from a pool of CV-NCOV-001 and -002 participants who received both CVnCoV doses and who were SARS-CoV-2 seronegative for shown time points. Fields with significant  $p \leq 0.05$  are colored according to Spearman correlation coefficient. Reactogenicity was calculated per participant as maximum severity grade (0=absent, 1=mild, 2=moderate, 3=severe) of vaccine-related solicited adverse events (any local or systemic sign/symptom) after both doses. Analysis performed using VNT and RBD IgG assay titers on indicated days and participants' age in years.

ELISA, enzyme-linked immunosorbent assay; IgG, immunoglobulin G; n, number of participants; RBD, receptor binding domain; VNT, virus neutralizing antibody.

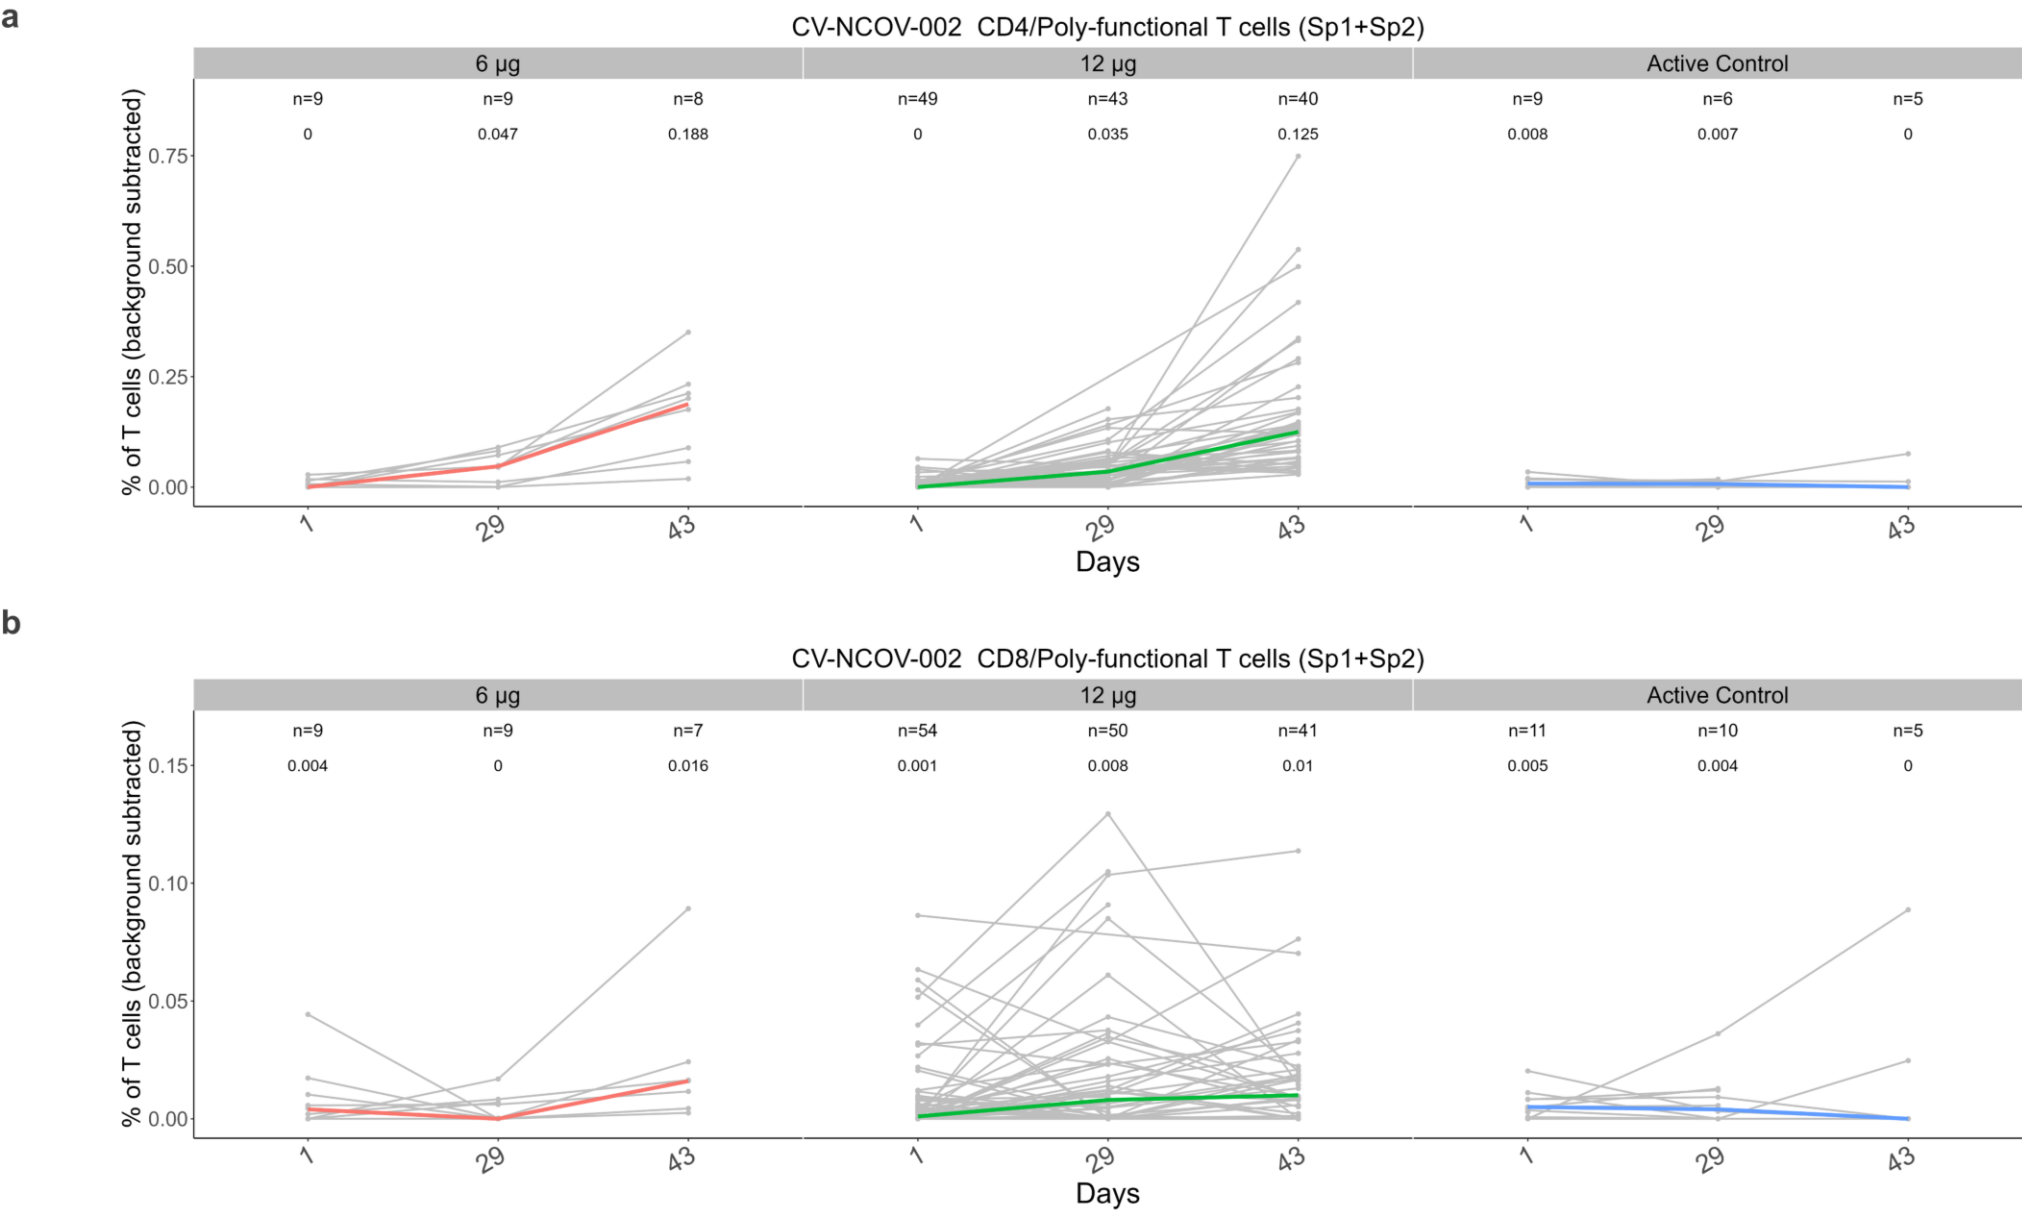

**Figure S11.** Ex Vivo ICS Analysis of Spike-Specific CD4<sup>+</sup> and CD8<sup>+</sup> T Cell Responses Post Vaccination in CV-NCOV-002 clinical trial. SARS-CoV-2-spike-specific CD4<sup>+</sup> and CD8<sup>+</sup> T cells were measured by intracellular cytokine staining after stimulation with individual spike pool 1 (Sp1) and spike pool 2 (Sp2). The total T cell frequencies were plotted for Day 1, Day 29 and Day 43 after participants received CVnCoV (6 or 12 µg) or an active control vaccine. Data from participants who were seronegative at baseline are shown. Values from individual participants are represented by grey symbols connected by grey lines, whilst colored lines display group medians. Values above data points indicate median of CD4<sup>+</sup> (a) and CD8<sup>+</sup> (b) T cells frequencies per time point.

ICS, intracellular cytokine staining; n, number of participants.

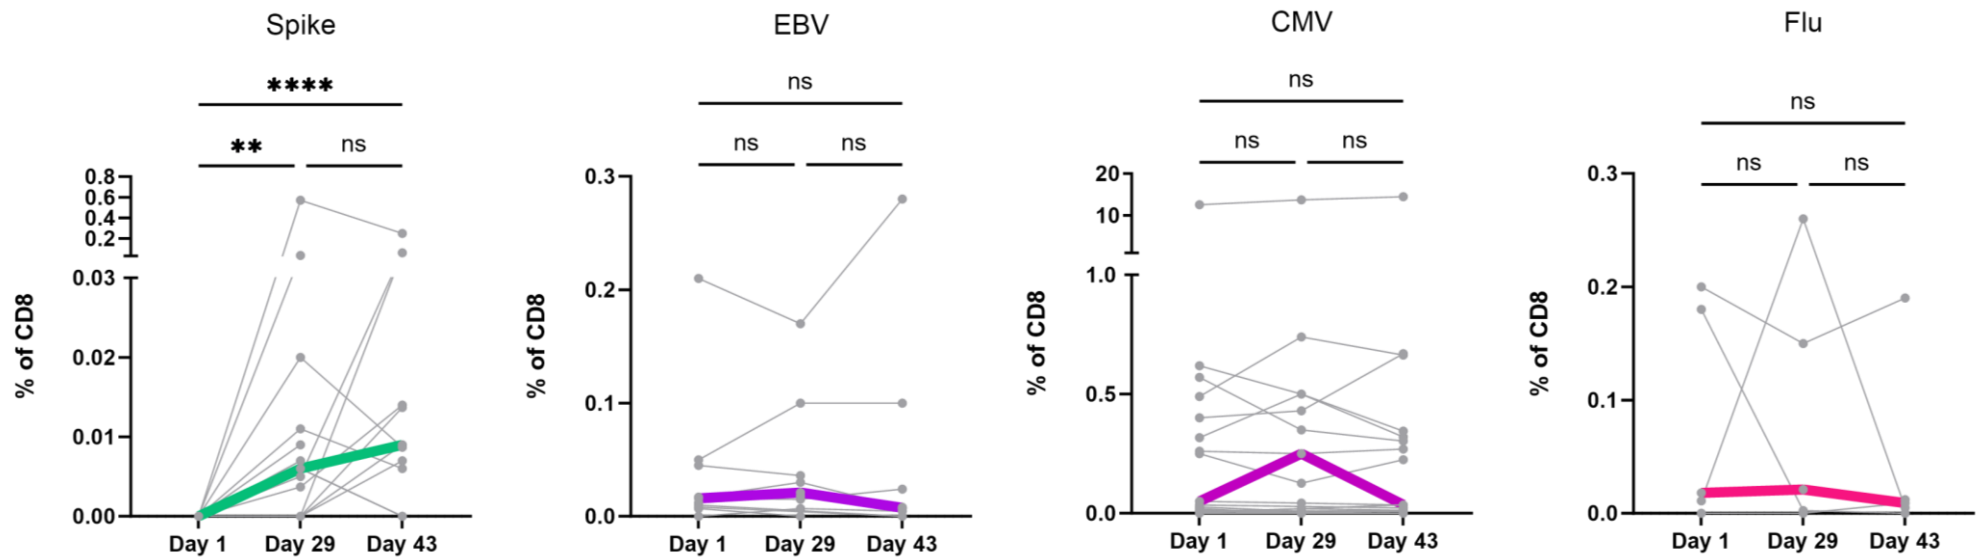

**Figure S12.** Frequencies of Antigen-Specific CD8+ T cells in Longitudinal Samples from CVnCoV Vaccinated Trial Participants. Virus specific CD8+ T cell responses were assessed using pooled data from CV-NCOV-002 participants vaccinated with different dose levels of CVnCoV (6 and 12 µg). HLA class I tetramer peptide antigens derived from CMV, EBV, influenza virus (Flu) or SARS-CoV-2 spike protein were used to stimulate antigen-specific CD8+ T cell responses. The percentage of CD8+ T cells for individual participants are represented by grey symbols connected by grey lines, whilst colored lines display group medians. Statistical analysis was performed using Kruskal Wallis test followed by Dunn's test for multiple comparisons. Statistical significance defined as \*\*  $p \leq 0.01$ , \*\*\*  $p \leq 0.001$  or not significant (ns) if  $p > 0.05$ .

CMV, cytomegalovirus; EBV, Epstein-Barr virus; Flu, influenza; ns, not significant.

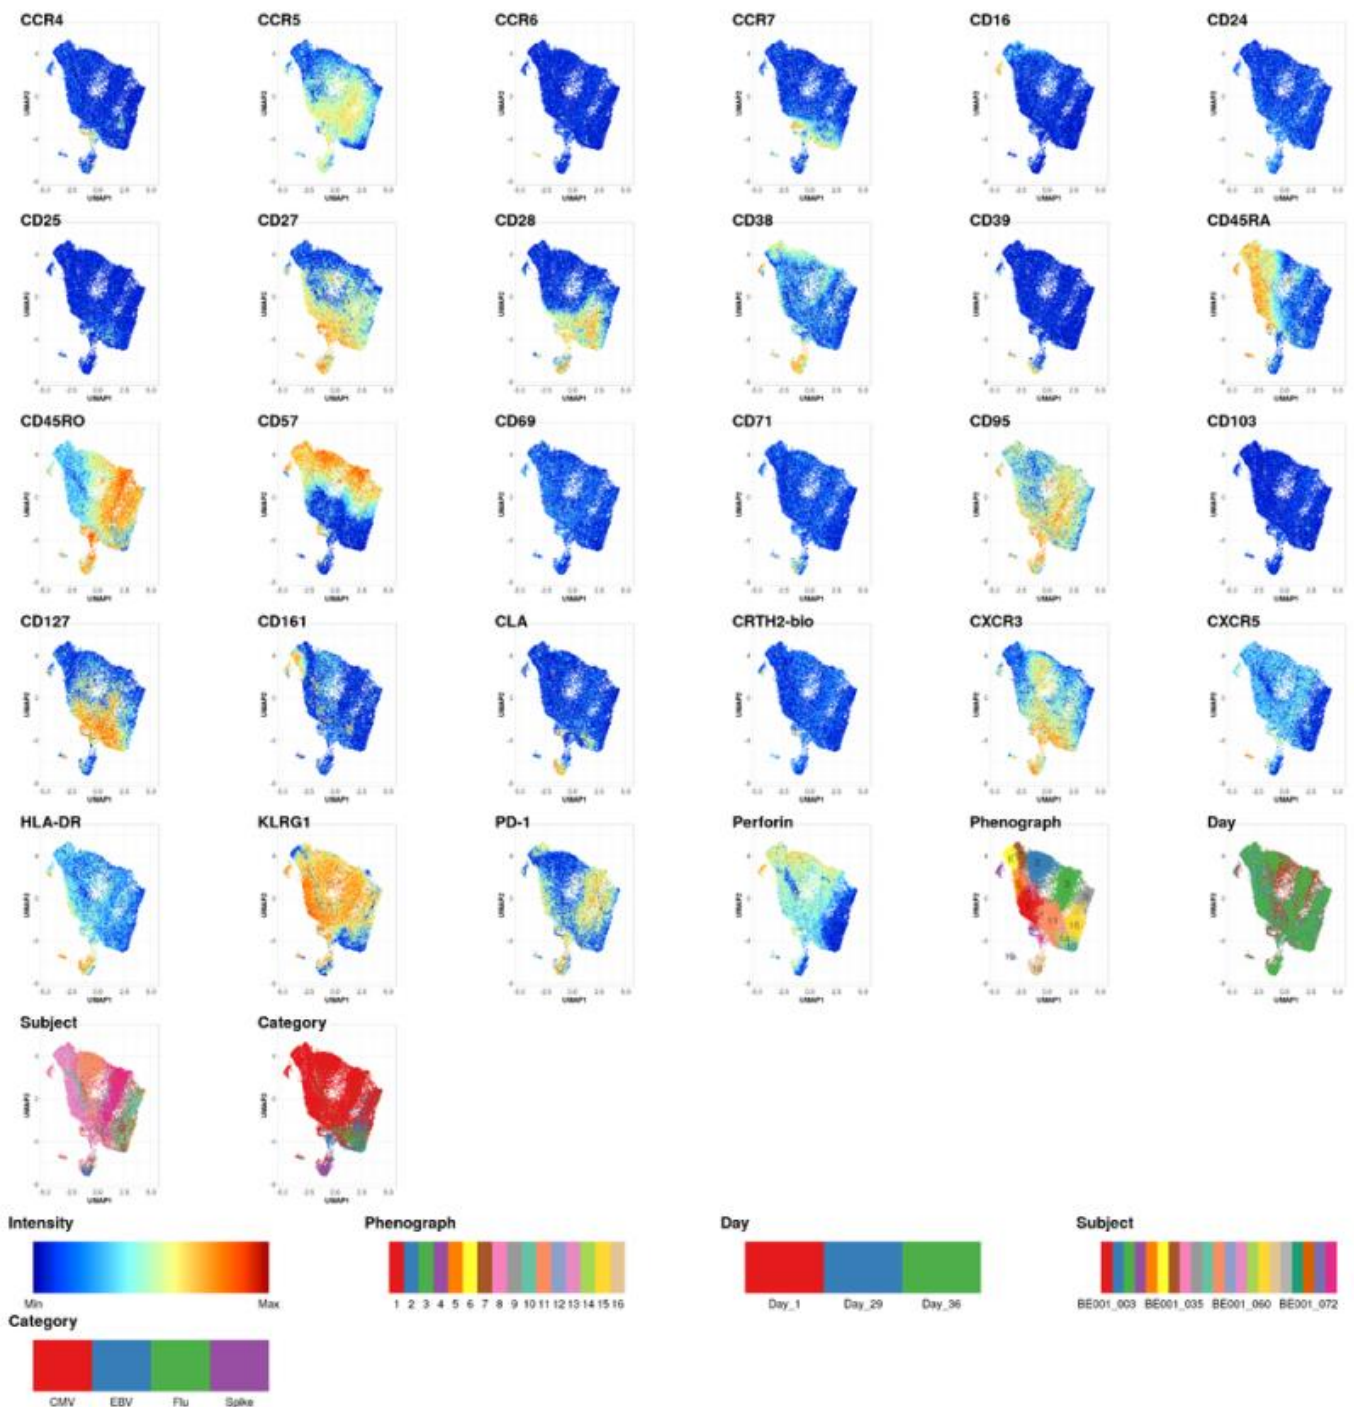

**Figure S13.** Phenotypes of Antigen-Specific CD8<sup>+</sup> T cells From CVnCoV Vaccinated Individuals. UMAP plots display the expression intensity of phenotypical markers in CD8<sup>+</sup> T cells specific to HLA class I tetramer peptide antigens from subjects analyzed in CV-NCOV-001. Category shows the HLA class I tetramer peptide antigens derived from CMV, EBV, or Influenza virus (Flu) controls or from SARS-CoV-2 Spike protein. Phenograph overlay created by unsupervised clustering algorithm.

CMV, cytomegalovirus; EBV, Epstein-Barr virus; Flu, influenza.

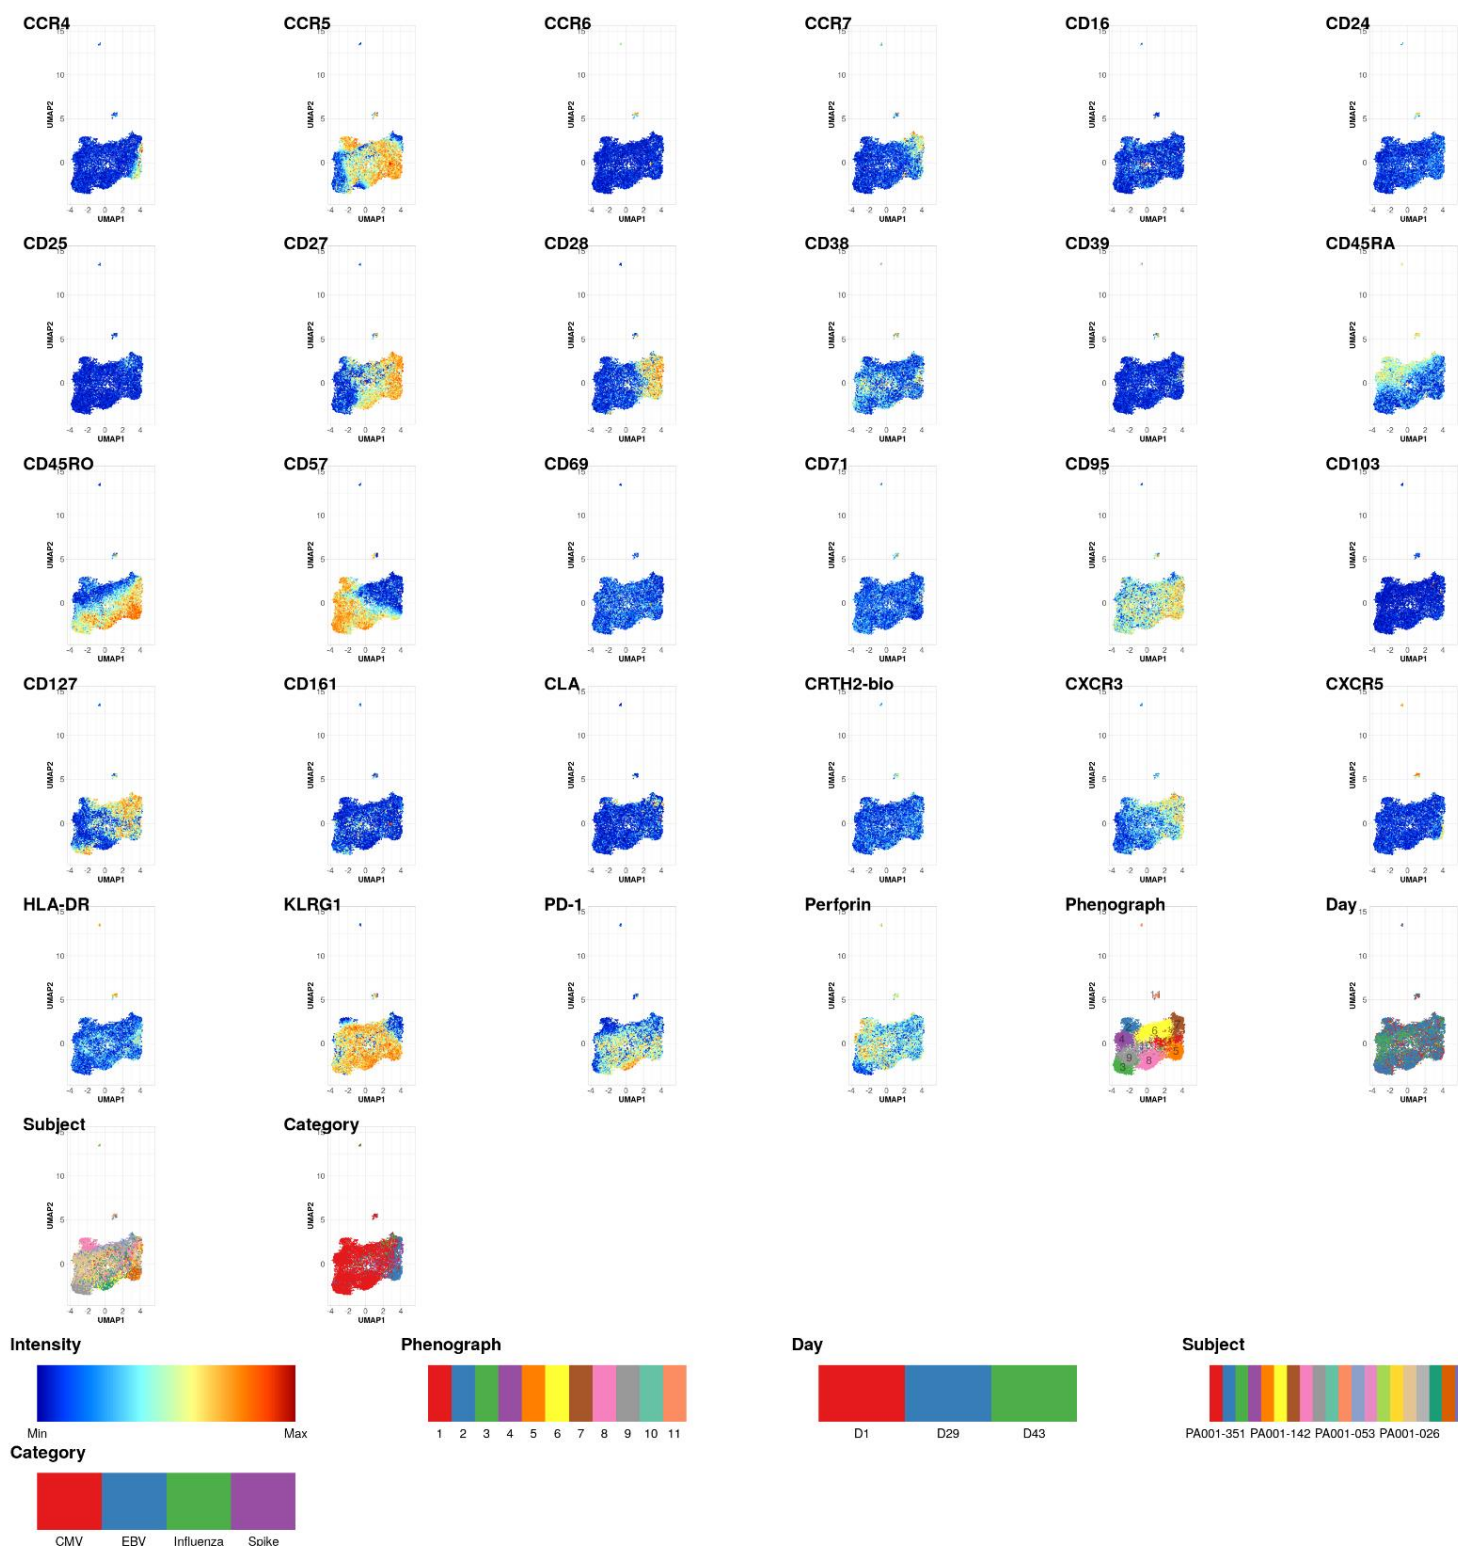

**Figure S14.** Phenotypes of Antigen-Specific CD8<sup>+</sup> T cells From CVnCoV Vaccinated Individuals. UMAP plots display the expression intensity of phenotypical markers in CD8<sup>+</sup> T cells specific to HLA class I tetramer peptide antigens from subjects analyzed in CV-NCOV-002. Category shows the HLA class I tetramer peptide antigens derived from CMV, EBV, or Influenza virus controls or from SARS-CoV-2 Spike protein. Phenograph overlay created by unsupervised clustering algorithm.

CMV, cytomegalovirus; EBV, Epstein-Barr virus.

## References

**Disclaimer/Publisher’s Note:** The statements, opinions and data contained in all publications are solely those of the individual author(s) and contributor(s) and not of MDPI and/or the editor(s). MDPI and/or the editor(s) disclaim responsibility for any injury to people or property resulting from any ideas, methods, instructions or products referred to in the content.

1. Love, M.I.; Huber, W.; Anders, S. Moderated estimation of fold change and dispersion for mna-seq data with deseq2. *Genome Biology* **2014**, *15*, 550, doi:10.1186/s13059-014-0550-8.
2. Team, R.C. R: A language and environment for statistical computing. R foundation for statistical computing, vienna, austria. Available online: <https://www.R-project.org/>. (accessed on 1 April 2024)
3. Benjamini, Y.; Hochberg, Y. Controlling the false discovery rate: A practical and powerful approach to multiple testing. *Journal of the Royal Statistical Society: Series B (Methodological)* **1995**, *57*, 289–300, doi:10.1111/j.2517-6161.1995.tb02031.x.
4. Subramanian, A.; Tamayo, P.; Mootha, V.K.; Mukherjee, S.; Ebert, B.L.; Gillette, M.A.; Paulovich, A.; Pomeroy, S.L.; Golub, T.R.; Lander, E.S.; et al. Gene set enrichment analysis: A knowledge-based approach for interpreting genome-wide expression profiles. *Proc Natl Acad Sci U S A* **2005**, *102*, 15545–15550, doi:10.1073/pnas.0506580102.
5. Mootha, V.K.; Lindgren, C.M.; Eriksson, K.-F.; Subramanian, A.; Sihag, S.; Lehar, J.; Puigserver, P.; Carlsson, E.; Ridderstråle, M.; Laurila, E.; et al. Pgc-1 $\alpha$ -responsive genes involved in oxidative phosphorylation are coordinately downregulated in human diabetes. *Nature Genetics* **2003**, *34*, 267–273, doi:10.1038/ng1180.
6. Li, S.; Roupheal, N.; Duraisingham, S.; Romero-Steiner, S.; Presnell, S.; Davis, C.; Schmidt, D.S.; Johnson, S.E.; Milton, A.; Rajam, G.; et al. Molecular signatures of antibody responses derived from a systems biology study of five human vaccines. *Nature Immunology* **2014**, *15*, 195–204, doi:10.1038/ni.2789.
7. Liberzon, A.; Birger, C.; Thorvaldsdóttir, H.; Ghandi, M.; Mesirov, J.P.; Tamayo, P. The molecular signatures database (msigdb) hallmark gene set collection. *Cell Syst* **2015**, *1*, 417–425, doi:10.1016/j.cels.2015.12.004.
8. Reimand, J.; Isserlin, R.; Voisin, V.; Kucera, M.; Tannus-Lopes, C.; Rostamianfar, A.; Wadi, L.; Meyer, M.; Wong, J.; Xu, C.; et al. Pathway enrichment analysis and visualization of omics data using g:Profiler, gsea, cytoscape and enrichmentmap. *Nature Protocols* **2019**, *14*, 482–517, doi:10.1038/s41596-018-0103-9.
9. Gu, Z.; Eils, R.; Schlesner, M. Complex heatmaps reveal patterns and correlations in multidimensional genomic data. *Bioinformatics* **2016**, *32*, 2847–2849, doi:10.1093/bioinformatics/btw313.
10. Wickham, H. *Ggplot2. Elegant graphics for data analysis*; Springer: Berlin/Heidelberg, Germany 2009.
